# Supplementary material for: Theoretical investigation of U(i) arene complexes: is the elusive monovalent oxidation state accessible?
Source: Royal Society of Chemistry journal article supplement (doi:10.1039/c8nj04722g), 2018-12-13
Supplement: c8nj04722g1.pdf [file c8nj04722g1.pdf]

## Supporting Information

### **Theoretical investigation of U(I) arene complexes: is the elusive monovalent oxidation state accessible?**

**Jia-Nan Tian,<sup>a</sup> Ming Zheng,<sup>a</sup> Li Li,<sup>a</sup> Georg Schreckenbach,<sup>c</sup> Yuan-Ru Guo,<sup>\*,b</sup> and Qing-Jiang Pan<sup>\*,a</sup>**

<sup>a</sup> Key Laboratory of Functional Inorganic Material Chemistry (Ministry of Education), School of Chemistry and Materials Science, Heilongjiang University, Harbin 150080, China

<sup>b</sup> Key Laboratory of Bio-based Material Science & Technology (Ministry of Education), College of Material Science and Engineering, Northeast Forestry University, Harbin 150040, China

<sup>c</sup> Department of Chemistry, University of Manitoba, Winnipeg, MB, R3T 2N2, Canada

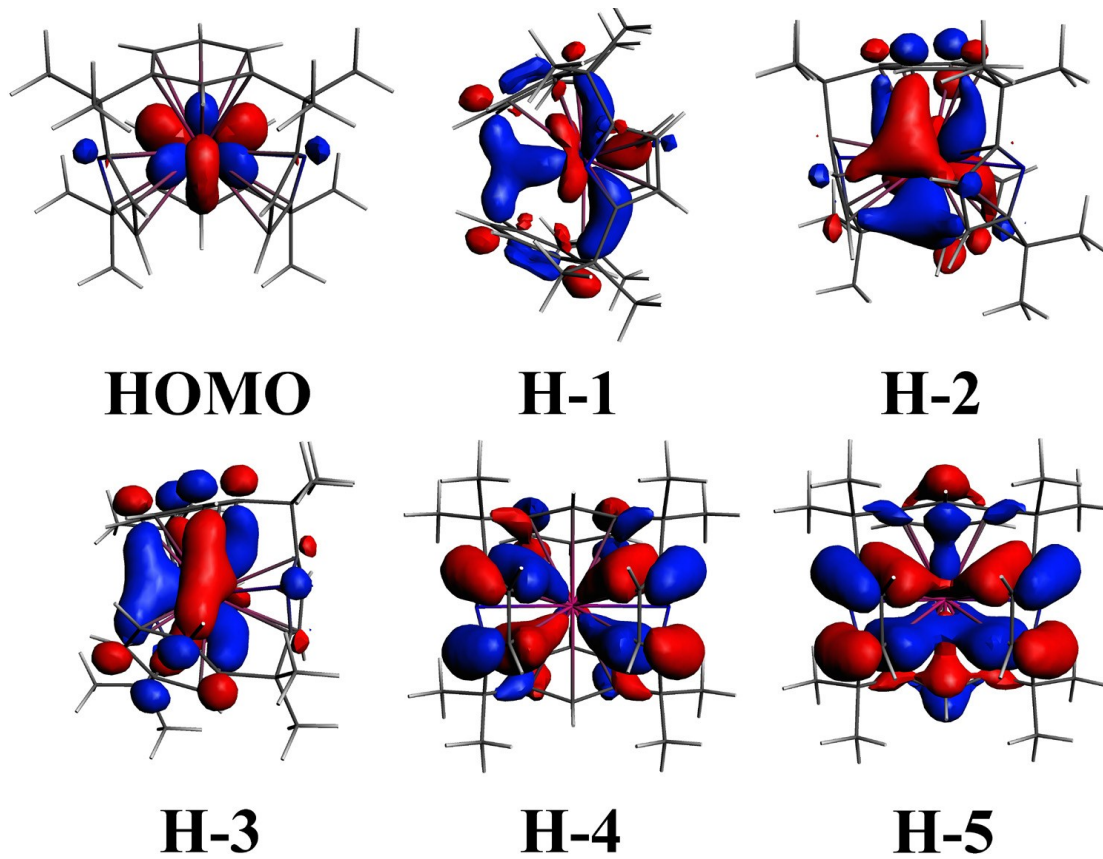

**Figure S1.** Characteristic  $\alpha$ -spin orbitals of  $[U^{III}L]$  (quintet ground state).

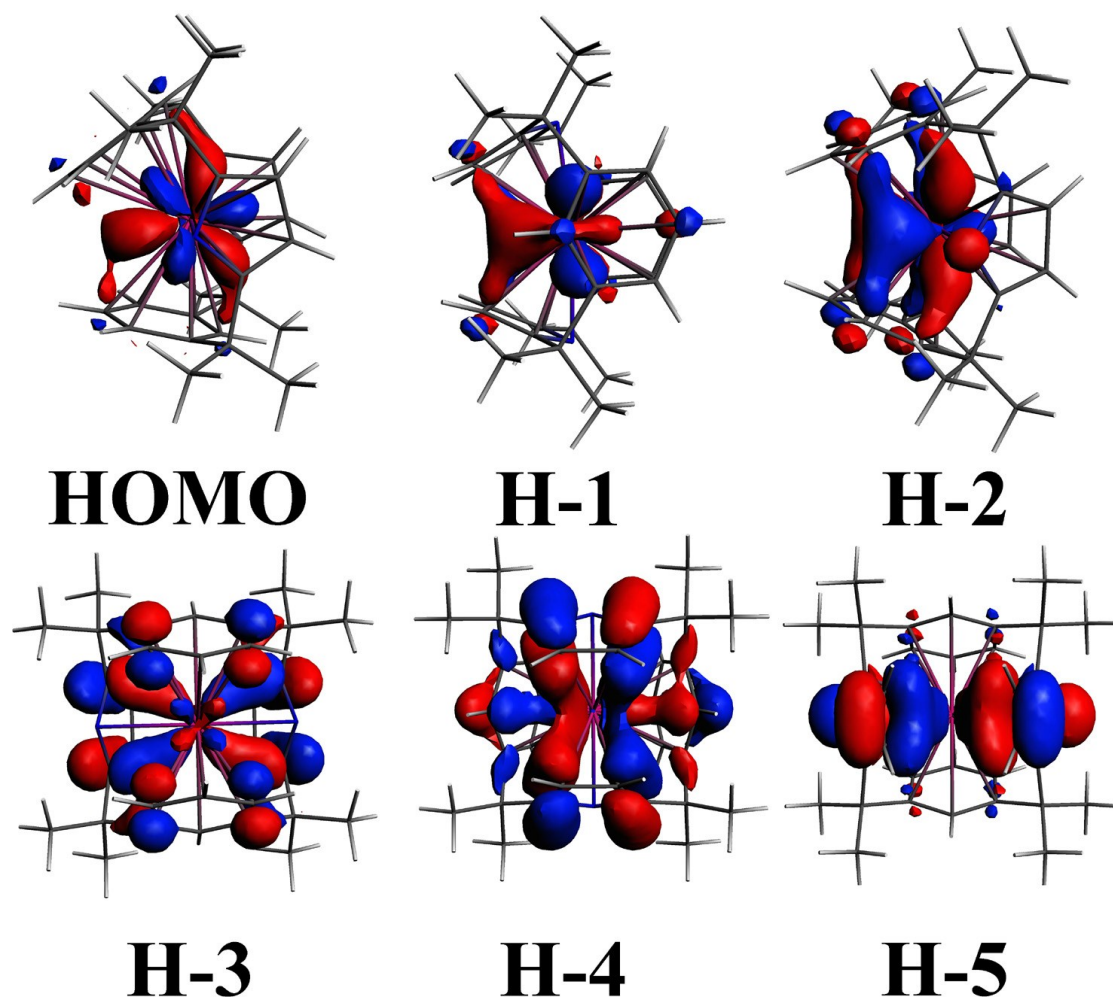

Figure S2. Characteristic  $\alpha$ -spin orbitals of  $[\text{U}^{\text{III}}\text{L}]^+$  (quartet ground state).

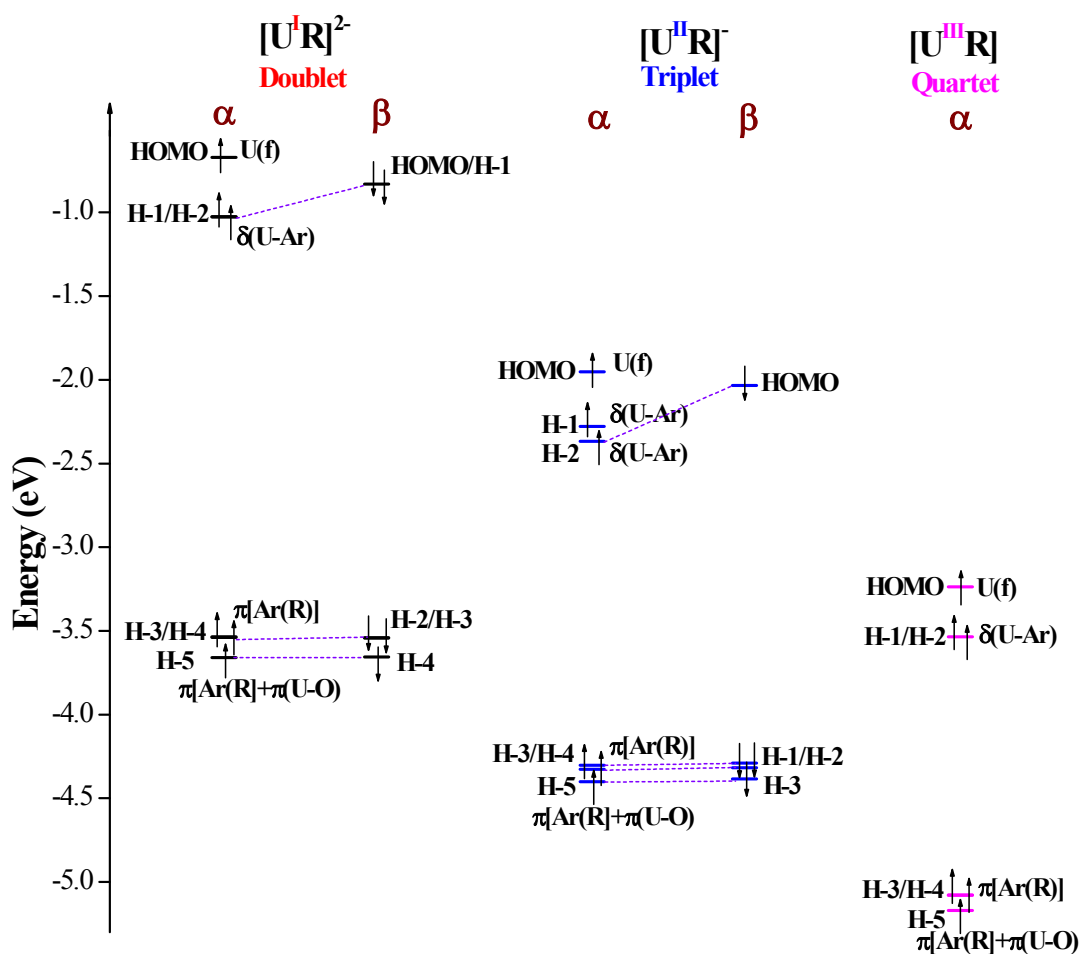

**Figure S3.** Energy levels of orbitals and character for  $[U^mR]^n$  complexes where the oxidation state ( $m$ ) ranges from I to III. Noting that only spin-up orbitals ( $\alpha$ ) are illustrated for the U(III) complex. Ar mentioned in the diagram denotes the central arene group of  $H_3R$  and Ar(R) means others.

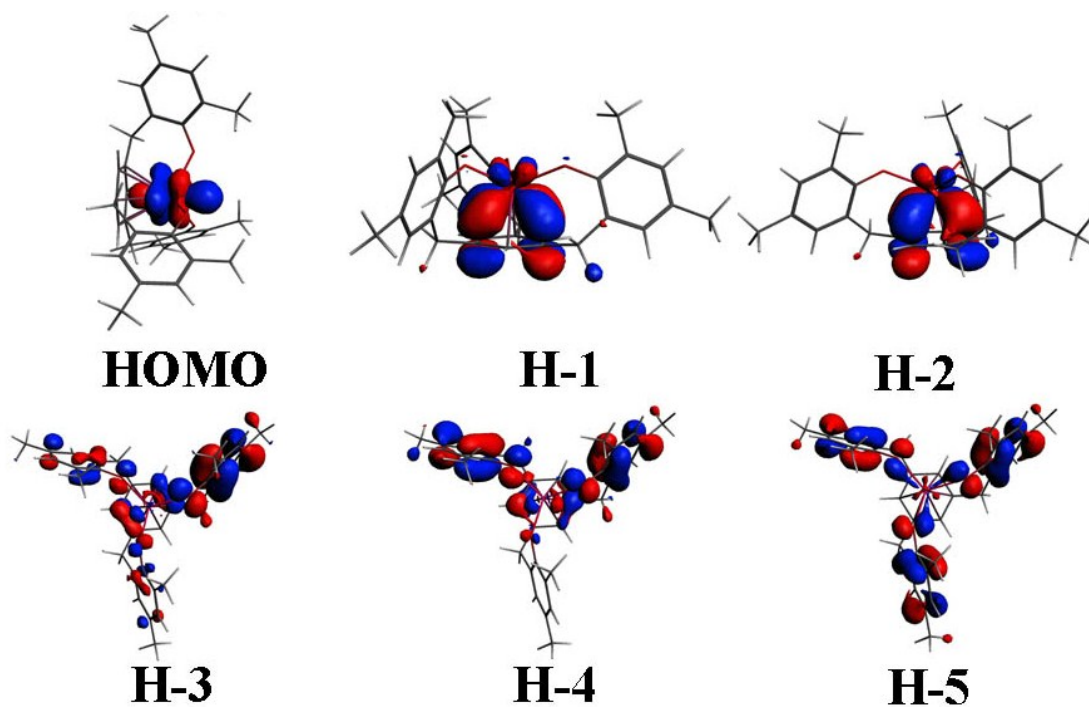

**Figure S4.** Characteristic  $\alpha$ -spin orbitals of  $[\text{U}^{\text{I}}\text{R}]^{2-}$  (doublet ground state).

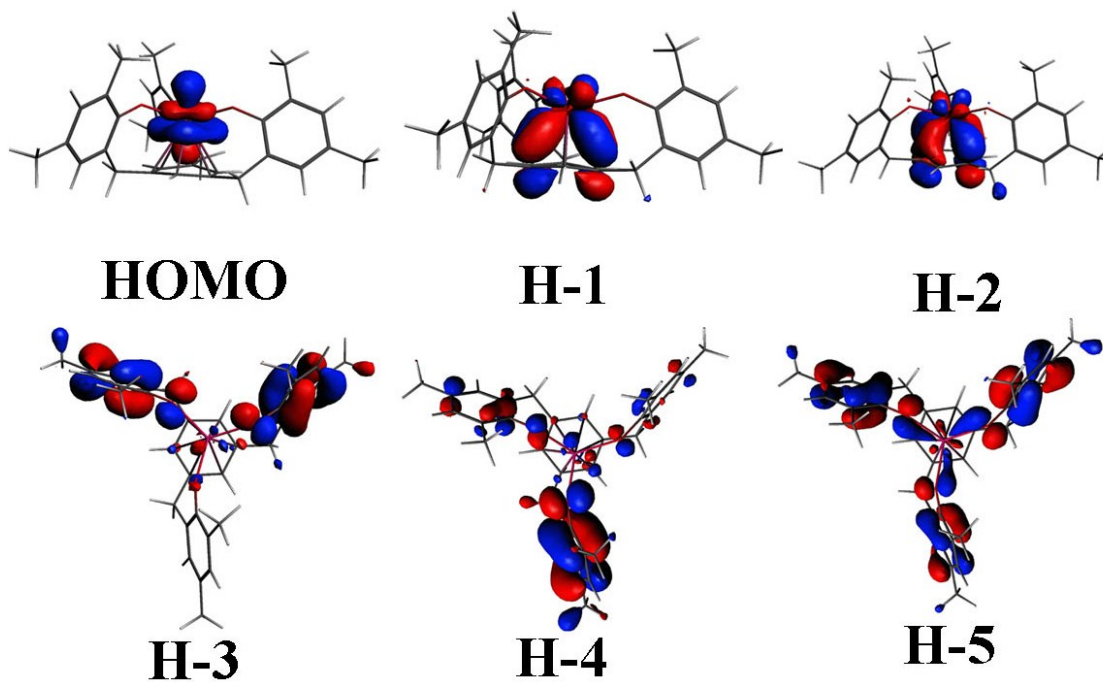

**Figure S5.** Characteristic  $\alpha$ -spin orbitals of  $[\text{U}^{\text{III}}\text{R}]^{-}$  (triplet ground state).

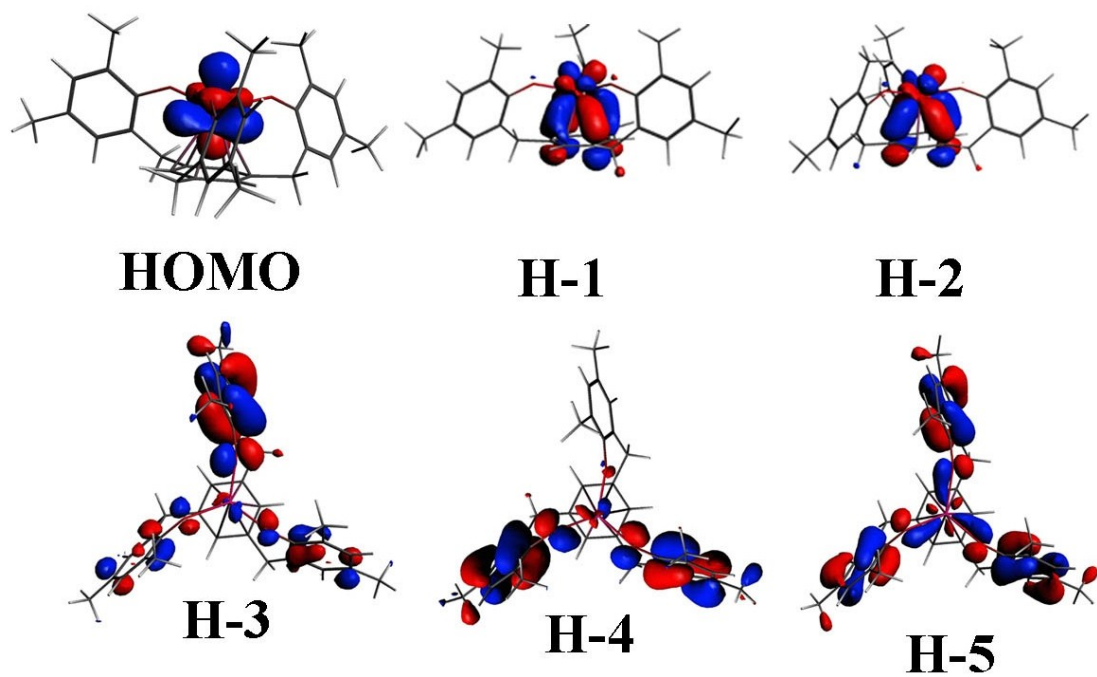

**Figure S6.** Characteristic  $\alpha$ -spin orbitals of [U<sup>III</sup>R] (quartet ground state).

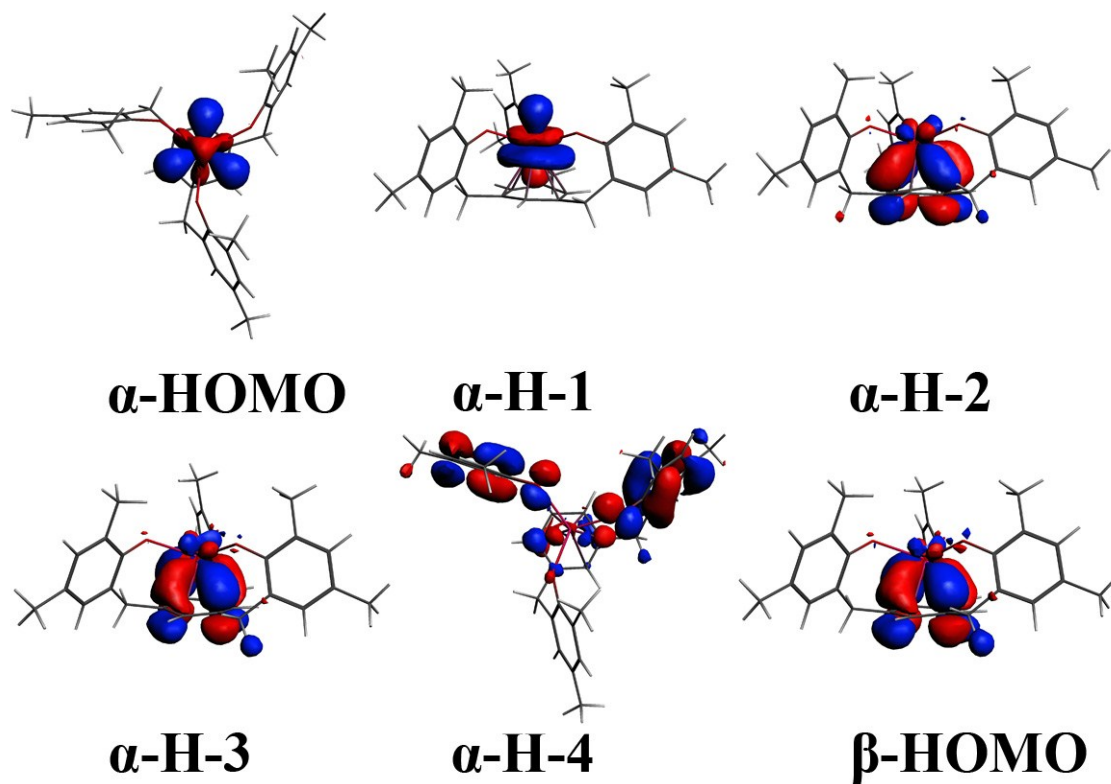

Figure S7. Characteristic orbitals of  $[U^1R]^{2-}$  (quartet state)

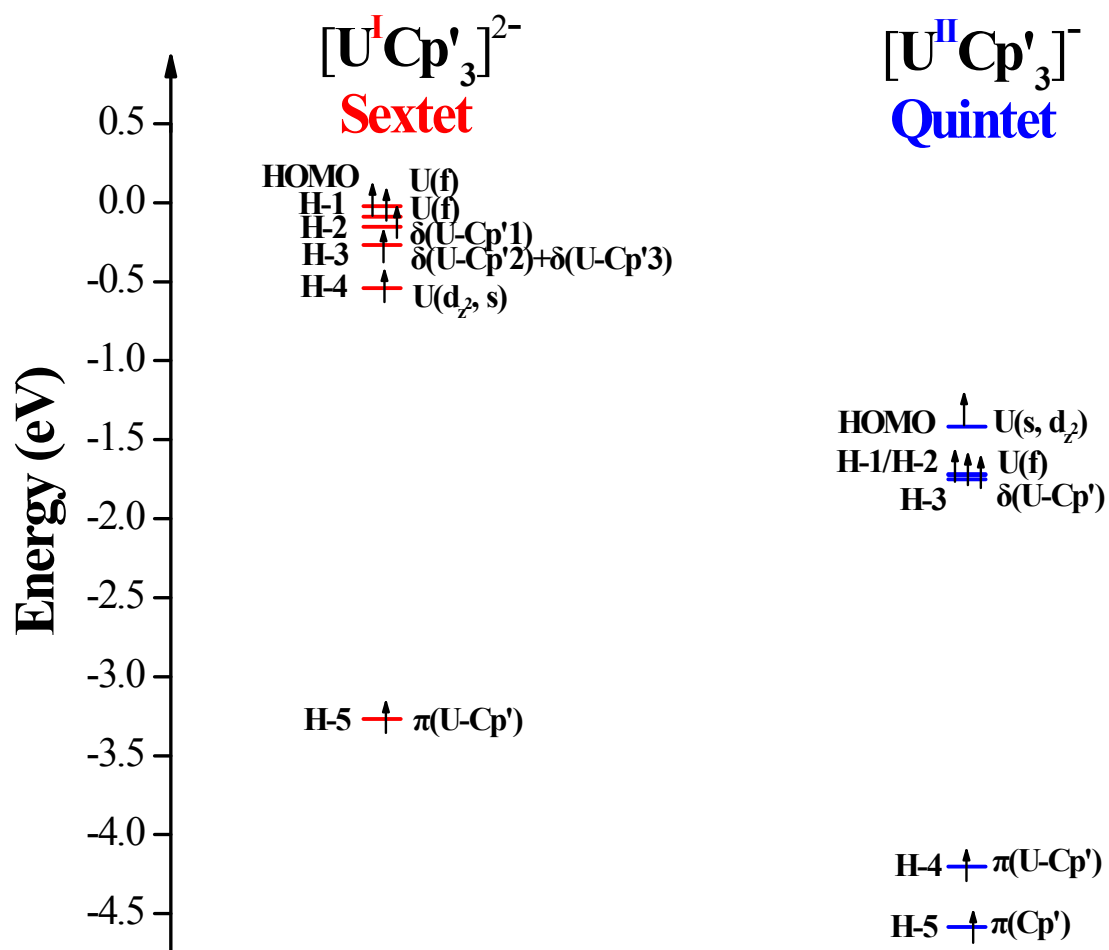

**Figure S8.** Energy levels of  $\alpha$ -spin orbitals and character for  $[\text{U}^m\text{Cp}'_3]^n$  complexes ( $m = \text{I and II}$ ).



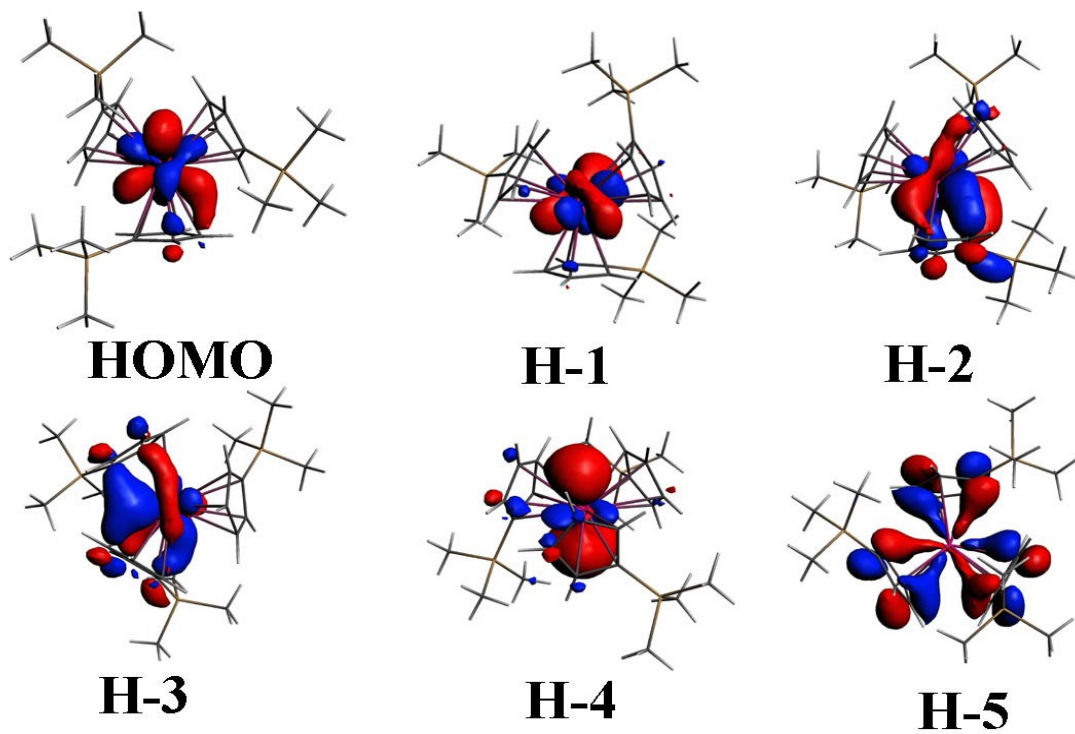

**Figure S9.** Characteristic  $\alpha$ -spin orbitals of the sextet ground state  $[\text{U}^{\text{I}}\text{Cp}'_3]^{2-}$ .

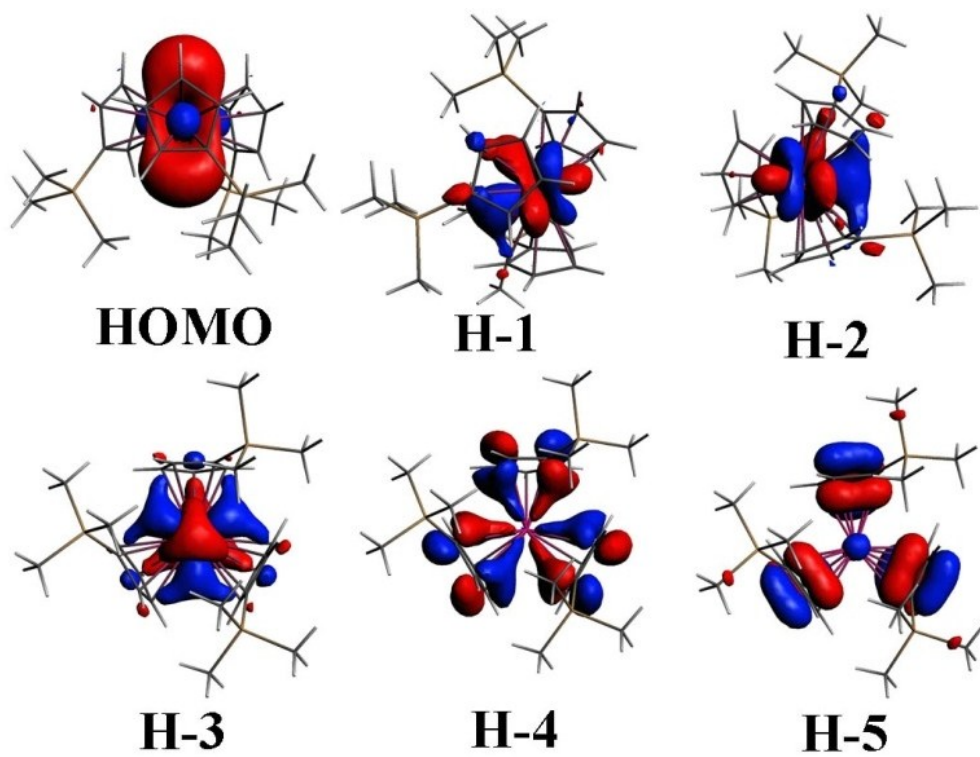

Figure S10. Characteristic  $\alpha$ -spin orbitals of  $[U^{II}Cp'_3]^-$  (quintet ground state).

**Table S1.** Calculated relative energies (eV) of uranium complexes in various electron-spin states (ESSs).

| Complexes                                        | ESSs    | $\Delta E^a$ | $\Delta E_0^a$ | $\Delta H^a$ | $\Delta G^a$ |
|--------------------------------------------------|---------|--------------|----------------|--------------|--------------|
| [U <sup>I</sup> L] <sup>-</sup>                  | Doublet | 0.192        | 0.180          | 0.185        | 0.170        |
|                                                  | Quartet | 0.000        | 0.000          | 0.000        | 0.000        |
|                                                  | Sextet  | 0.614        | 0.595          | 0.597        | 0.571        |
| [U <sup>II</sup> L]                              | Singlet | 0.508        | 0.485          | 0.489        | 0.483        |
|                                                  | Triplet | 0.116        | 0.101          | 0.104        | 0.095        |
|                                                  | Quintet | 0.000        | 0.000          | 0.000        | 0.000        |
|                                                  | Septet  | 2.040        | 1.944          | 1.951        | 1.930        |
| [U <sup>III</sup> L] <sup>+</sup>                | Doublet | 0.343        | 0.328          | 0.328        | 0.333        |
|                                                  | Quartet | 0.000        | 0.000          | 0.000        | 0.000        |
|                                                  | Sextet  | 2.092        | 1.990          | 2.001        | 1.984        |
| [U <sup>I</sup> R] <sup>2-</sup>                 | Doublet | 0.000        | 0.000          | 0.000        | 0.000        |
|                                                  | Quartet | 0.000        | 0.010          | 0.006        | 0.024        |
|                                                  | Sextet  | 0.673        | 0.624          | 0.634        | 0.593        |
| [U <sup>II</sup> R] <sup>-</sup>                 | Singlet | 0.164        | 0.176          | 0.165        | 0.255        |
|                                                  | Triplet | 0.000        | 0.000          | 0.000        | 0.000        |
|                                                  | Quintet | 0.059        | 0.086          | 0.082        | 0.086        |
| [U <sup>III</sup> R]                             | Doublet | 0.294        | 0.248          | 0.261        | 0.199        |
|                                                  | Quartet | 0.000        | 0.000          | 0.000        | 0.000        |
| [U <sup>I</sup> Cp' <sub>3</sub> ] <sup>2-</sup> | Doublet | 0.353        | 0.309          | 0.314        | 0.314        |
|                                                  | Quartet | 0.165        | 0.180          | 0.177        | 0.177        |
|                                                  | Sextet  | 0.000        | 0.000          | 0.000        | 0.000        |
| [U <sup>II</sup> Cp' <sub>3</sub> ] <sup>-</sup> | Singlet | 1.041        | 0.987          | 0.987        | 0.987        |
|                                                  | Triplet | 0.413        | 0.405          | 0.406        | 0.406        |
|                                                  | Quintet | 0.000        | 0.000          | 0.000        | 0.000        |

<sup>a</sup> The total energy (E), total energy including zero-point vibrational energy ( $E_0$ ) and enthalpy (H) and free energy correction (G), where temperature is 298.15 K. And  $\Delta E$ ,  $\Delta E_0$ ,  $\Delta H$  and  $\Delta G$  (in eV) denote the relative energy with respect to the lowest-energy isomer.

**Table S2.** Optimized geometry parameters for the uranium complexes ligated by H<sub>3</sub>R, compared with experimental values. (Distance in Å and angle in °)

| Complexes                                         | [U <sup>IV</sup> R] <sup>2-</sup> | [U <sup>IV</sup> R] <sup>-</sup> | [U <sup>IV</sup> RE] <sup>-</sup> |                    | [U <sup>III</sup> R] | [U <sup>III</sup> RE] |                    | [U <sup>III</sup> RE <sup>2</sup> ] | H <sub>3</sub> R |
|---------------------------------------------------|-----------------------------------|----------------------------------|-----------------------------------|--------------------|----------------------|-----------------------|--------------------|-------------------------------------|------------------|
| Appr.s                                            | Calc.                             | Calc.                            | Calc.                             | Expt. <sup>b</sup> | Calc.                | Calc.                 | Expt. <sup>b</sup> | Expt. <sup>c</sup>                  | Calc.            |
| (U-C <sub>Ar</sub> ) <sub>av</sub>                | 2.509                             | 2.576                            | 2.580                             | 2.615              | 2.692                | 2.691                 | 2.749              | 2.731                               |                  |
| U-C <sub>Ar</sub>                                 | 2.498~2.520                       | 2.492~2.612                      | 2.476~2.649                       | 2.597~2.633        | 2.689~2.694          | 2.669~2.712           | 2.729~2.774        | 2.719~2.745                         |                  |
| U-Ar <sub>cent</sub>                              | 2.055                             | 2.143                            | 2.144                             | 2.180              | 2.288                | 2.280                 | 2.350              | 2.335                               |                  |
| U-O                                               | 2.270                             | 2.213                            | 2.221                             | 2.236              | 2.154                | 2.160                 | 2.168              | 2.164                               |                  |
| U <sub>o3</sub> <sup>a</sup>                      | 0.867                             | 0.685                            | 0.674                             | 0.668              | 0.479                | 0.508                 | 0.475              | 0.465                               |                  |
| (C <sub>Ar</sub> -C <sub>Ar</sub> ) <sub>av</sub> | 1.440                             | 1.431                            | 1.442                             | 1.432              | 1.418                | 1.429                 | 1.423              | 1.419                               | 1.400            |
| C <sub>Ar</sub> -C <sub>Ar</sub>                  | 1.439~1.441                       | 1.398~1.448                      | 1.402~1.464                       | 1.432              | 1.417~1.418          | 1.428~1.431           | 1.417~1.428        | 1.414~1.424                         | 1.398~1.401      |
| O-U-O                                             | 106.3                             | 110.9                            | 111.2                             | 111.5              | 115.2                | 114.6                 | 115.3              | 115.5                               |                  |
| θ1 <sup>d</sup>                                   | 4.3                               | 2.4~13.7                         | 4.6~21.4                          | 5.7~5.8            | 0.8~0.9              | 6.5~6.6               | 4.1~6.8            | 0.7~2.8                             | 0.1~0.8          |
| θ2 <sup>d</sup>                                   | 4.3                               | 8.3                              | 11.9                              | 5.8                | 0.8                  | 6.5                   | 5.4                | 1.6                                 | 0.4              |

<sup>a</sup> U<sub>o3</sub> denotes the normal distance of the U ion to the plane defined by three oxygen donors, and a positive value refers to U being below the O3 plane.

<sup>b</sup> Experimental values of [U<sup>IV</sup>RE]<sup>-</sup> and [U<sup>III</sup>RE] from Refs. 5, 8.

<sup>c</sup> H<sub>3</sub>RE<sup>2</sup> is (<sup>t</sup>-Bu, <sup>t</sup>-Bu ArOH)<sub>3</sub>*mesitylene*; experimental values of its U<sup>III</sup> complex taken from Ref. 9.

<sup>d</sup> θ1 is the dihedral angle of the central arene and θ2 is the average value.

**Table S3.** Optimized geometry parameters for the uranium complexes ligated by Cp' ligands, compared with experimental values. (Distance in Å and angle in °)

| Complexes<br>Approaches                | [U <sup>I</sup> Cp' <sub>3</sub> ] <sup>2-</sup> | [U <sup>II</sup> Cp' <sub>3</sub> ] <sup>-</sup> |                    |
|----------------------------------------|--------------------------------------------------|--------------------------------------------------|--------------------|
|                                        | Calc.                                            | Calc.                                            | Expt. <sup>c</sup> |
| (U-C) <sub>av</sub>                    | 2.802                                            | 2.786                                            | 2.794              |
| U-C                                    | 2.739~2.841                                      | 2.757~2.819                                      | 2.762~2.822        |
| (U-Cp' <sub>cent</sub> ) <sub>av</sub> | 2.524                                            | 2.508                                            | 2.521              |
| U-Cp' <sub>cent</sub>                  | 2.516~2.531                                      | 2.508                                            | 2.514~2.530        |
| β1 <sup>a</sup>                        | 117.6                                            | 119.9                                            | 123.1              |
| β2 <sup>a</sup>                        | 120.1                                            | 119.9                                            | 118.8              |
| β3 <sup>a</sup>                        | 118                                              | 119.9                                            | 118.1              |
| γ1 <sup>b</sup>                        | 59.4                                             | 60.3                                             | 57.1               |
| γ2 <sup>b</sup>                        | 61.8                                             | 60.3                                             | 60.8               |
| γ3 <sup>b</sup>                        | 64.3                                             | 60.3                                             | 62.2               |

<sup>a</sup> β1, β2 and β3 denote the Cp'<sub>1cent</sub>-U-Cp'<sub>2cent</sub>, Cp'<sub>2cent</sub>-U-Cp'<sub>3cent</sub>, and Cp'<sub>1cent</sub>-U-Cp'<sub>3cent</sub> angles, respectively.

<sup>b</sup> γ1 is the interplanar angle between Cp'1 and Cp'2, γ2 between Cp'2 and Cp'3, and γ3 is between Cp'1 and Cp'3.

<sup>c</sup> Experimental values for [U<sup>II</sup>Cp'<sub>3</sub>]<sup>-</sup> from Ref. <sup>1</sup>.

**Table S4.** Electron-spin density (S) and Mulliken charge (Q) of uranium complexes calculated by the Priroda code.

| Complexes                                        | ESSs    | S <sub>U</sub> | S <sub>Ligand</sub> | Q <sub>U</sub> | Q <sub>Ligand</sub> |
|--------------------------------------------------|---------|----------------|---------------------|----------------|---------------------|
| [U <sup>I</sup> L] <sup>-</sup>                  | Quartet | 2.679          | 0.321               | 1.905          | -2.905              |
| [U <sup>II</sup> L]                              | Quintet | 3.170          | 0.830               | 1.939          | -1.939              |
| [U <sup>III</sup> L] <sup>+</sup>                | Quartet | 2.742          | 0.258               | 2.006          | -1.006              |
| [U <sup>I</sup> R] <sup>2-</sup>                 | Doublet | 1.250          | -0.250              | 1.252          | -3.252              |
| [U <sup>II</sup> R] <sup>-</sup>                 | Triplet | 1.987          | 0.013               | 1.368          | -2.368              |
| [U <sup>III</sup> R]                             | Quartet | 2.649          | 0.351               | 1.437          | -1.437              |
| [U <sup>I</sup> Cp' <sub>3</sub> ] <sup>2-</sup> | Sextet  | 4.379          | 0.621               | 0.967          | -2.967              |
| [U <sup>II</sup> Cp' <sub>3</sub> ] <sup>-</sup> | Quintet | 3.784          | 0.216               | 1.335          | -2.335              |

**Table S5.** Electron-spin density (S) and Mulliken charge (Q) of uranium complexes in the gas phase calculated by the ADF code.

| Complexes                                | ESSs    | $S_U$ | $S_{\text{Ligand}}$ | $Q_U$ | $Q_{\text{Ligand}}$ |
|------------------------------------------|---------|-------|---------------------|-------|---------------------|
| $[\text{U}^{\text{I}}\text{L}]^-$        | Quartet | 2.696 | 0.305               | 0.681 | -1.681              |
| $[\text{U}^{\text{II}}\text{L}]$         | Quintet | 3.205 | 0.795               | 0.532 | -0.532              |
| $[\text{U}^{\text{III}}\text{L}]^+$      | Quartet | 2.735 | 0.265               | 0.448 | 0.552               |
| $[\text{U}^{\text{I}}\text{R}]^{2-}$     | Doublet | 1.250 | -0.250              | 1.375 | -3.375              |
| $[\text{U}^{\text{II}}\text{R}]^-$       | Triplet | 2.000 | 0.000               | 1.467 | -2.467              |
| $[\text{U}^{\text{III}}\text{R}]$        | Quartet | 2.672 | 0.328               | 1.512 | -1.512              |
| $[\text{U}^{\text{I}}\text{Cp}'_3]^{2-}$ | Sextet  | 4.156 | 0.844               | 0.555 | -2.555              |
| $[\text{U}^{\text{II}}\text{Cp}'_3]^-$   | Quintet | 3.829 | 0.171               | 0.561 | -1.561              |

**Table S6.** Electron-spin density (S) and Mulliken charge (Q) of uranium complexes in solution calculated by the ADF code.

| Complexes                                        | ESSs    | S <sub>U</sub> | S <sub>Ligand</sub> | Q <sub>U</sub> | Q <sub>Ligand</sub> |
|--------------------------------------------------|---------|----------------|---------------------|----------------|---------------------|
| [U <sup>I</sup> L] <sup>-</sup>                  | Quartet | 2.704          | 0.296               | 0.733          | -1.733              |
| [U <sup>II</sup> L]                              | Quintet | 3.205          | 0.795               | 0.548          | -0.548              |
| [U <sup>III</sup> L] <sup>+</sup>                | Quartet | 2.745          | 0.255               | 0.454          | 0.546               |
| [U <sup>I</sup> R] <sup>2-</sup>                 | Doublet | 1.310          | -0.310              | 1.470          | -3.470              |
| [U <sup>II</sup> R] <sup>-</sup>                 | Triplet | 2.000          | 0.000               | 1.480          | -2.480              |
| [U <sup>III</sup> R]                             | Quartet | 2.682          | 0.318               | 1.515          | -1.515              |
| [U <sup>I</sup> Cp' <sub>3</sub> ] <sup>2-</sup> | Sextet  | 4.311          | 0.689               | 0.557          | -2.557              |
| [U <sup>II</sup> Cp' <sub>3</sub> ] <sup>-</sup> | Quintet | 3.846          | 0.154               | 0.566          | -1.566              |



**Table S7.** Averaged QTAIM data<sup>a</sup> (au.) at U-X BCPs in uranium complexes.

| Complexes                        | Ring | X <sup>b</sup> | $\rho(r)$ | $\nabla^2\rho(r)$ | H(r) <sup>c</sup> | V(r)    | G(r)   |
|----------------------------------|------|----------------|-----------|-------------------|-------------------|---------|--------|
| [U <sup>I</sup> L] <sup>-</sup>  | PI1  | N              | 0.0306    | 0.1103            | 0.0006            | -0.0263 | 0.0269 |
|                                  |      | C              | 0.0329    | 0.0892            | -0.0023           | -0.0269 | 0.0246 |
|                                  | PI2  | N              | 0.0306    | 0.1103            | 0.0006            | -0.0263 | 0.0269 |
|                                  |      | C              | 0.0329    | 0.0893            | -0.0023           | -0.0269 | 0.0246 |
| [U <sup>II</sup> L]              | PI1  | N              | 0.0521    | 0.3760            | 0.0092            | -0.0756 | 0.0848 |
|                                  |      | C              | 0.0365    | 0.0977            | -0.0032           | -0.0309 | 0.0277 |
|                                  | PI2  | N              | 0.0360    | 0.1274            | -0.0001           | -0.0321 | 0.0320 |
|                                  |      | C              | 0.0365    | 0.0977            | -0.0032           | -0.0309 | 0.0277 |
| [U <sup>I</sup> R] <sup>2-</sup> | —    | O              | 0.0865    | 0.3006            | -0.0118           | -0.0987 | 0.0869 |
| [U <sup>II</sup> R] <sup>-</sup> | —    | O              | 0.0953    | 0.3623            | -0.0154           | -0.1214 | 0.1060 |

<sup>a</sup> QTAIM data include electron density  $\rho(r)$ , Laplacian  $\nabla^2\rho(r)$  and energy density H(r).

<sup>b</sup> X denotes N or C atoms of pyrrolic (PI) rings, and O atom in R complexes.

<sup>c</sup> H(r) is the sum of potential V(r) and kinetic G(r) energy density.

**Table S8.** Electron-spin density (S) of uranium complexes calculated by the Priroda code.

| Complexes                                        | ESSs           | S <sub>U</sub> | S <sub>Ligand</sub> | ΔS <sub>U</sub> <sup>a</sup> | ΔS <sub>Ligand</sub> <sup>a</sup> |
|--------------------------------------------------|----------------|----------------|---------------------|------------------------------|-----------------------------------|
| [U <sup>I</sup> L] <sup>-</sup>                  | Doublet        | 0.903          | 0.097               | 0.903                        | 0.097                             |
|                                                  | Quartet        | 2.679          | 0.321               | 0.691                        | 0.309                             |
|                                                  | Sextet         | 3.478          | 1.522               | 0.308                        | 0.692                             |
|                                                  | <b>Average</b> |                |                     | <b>0.634</b>                 | <b>0.366</b>                      |
| [U <sup>II</sup> L]                              | Singlet        | 0.000          | 0.000               |                              |                                   |
|                                                  | Triplet        | 1.988          | 0.012               | 0.940                        | 0.060                             |
|                                                  | Quintet        | 3.170          | 0.830               | 0.428                        | 0.572                             |
|                                                  | <b>Average</b> |                |                     | <b>0.684</b>                 | <b>0.316</b>                      |
| [U <sup>III</sup> L] <sup>+</sup>                | Doublet        | 1.048          | -0.048              |                              |                                   |
|                                                  | Quartet        | 2.742          | 0.258               |                              |                                   |
| [U <sup>I</sup> R] <sup>2-</sup>                 | Doublet        | 1.250          | -0.250              | 1.250                        | -0.250                            |
|                                                  | Quartet        | 2.679          | 0.321               | 0.692                        | 0.308                             |
|                                                  | Sextet         | 3.447          | 1.553               | 0.274                        | 0.726                             |
|                                                  | <b>Average</b> |                |                     | <b>0.739</b>                 | <b>0.261</b>                      |
| [U <sup>II</sup> R] <sup>-</sup>                 | Singlet        | 0.000          | 0.000               |                              |                                   |
|                                                  | Triplet        | 1.987          | 0.013               | 1.079                        | -0.079                            |
|                                                  | Quintet        | 3.173          | 0.827               | 0.524                        | 0.476                             |
|                                                  | <b>Average</b> |                |                     | <b>0.802</b>                 | <b>0.199</b>                      |
| [U <sup>III</sup> R]                             | Doublet        | 0.908          | 0.092               |                              |                                   |
|                                                  | Quartet        | 2.649          | 0.351               |                              |                                   |
| [U <sup>I</sup> Cp <sub>3</sub> '] <sup>2-</sup> | Doublet        | 1.146          | -0.146              | 1.146                        | -0.146                            |
|                                                  | Quartet        | 2.724          | 0.276               | 0.709                        | 0.291                             |
|                                                  | Sextet         | 4.379          | 0.621               | 0.595                        | 0.405                             |
|                                                  | <b>Average</b> |                |                     | <b>0.817</b>                 | <b>0.183</b>                      |
| [U <sup>II</sup> Cp <sub>3</sub> '] <sup>-</sup> | Singlet        | 0.000          | 0.000               |                              |                                   |
|                                                  | Triplet        | 2.015          | -0.015              |                              |                                   |
|                                                  | Quintet        | 3.784          | 0.216               |                              |                                   |

<sup>a</sup> ΔS<sub>U</sub> and ΔS<sub>Ligand</sub> correspond to one-electron reduction, for instance the doublet state of [U<sup>I</sup>L]<sup>-</sup> comes from the reduction of the singlet state of [U<sup>II</sup>L].

## **The full reference of ADF**

E. J. Baerends, T. Ziegler, J. Autschbach, D. Bashford, A. Bérces, F. M. Bickelhaupt, C. Bo, P. M. Boerrigter, L. Cavallo, D. P. Chong, L. Deng, R. M. Dickson, D. E. Ellis, M. van Faassen, L. Fan, T. H. Fischer, C. Fonseca Guerra, M. Franchini, A. Ghysels, A. Giammona, S. J. A. van Gisbergen, A. W. Götz, J. A. Groeneveld, O. V. Gritsenko, M. Grüning, S. Gusarov, F. E. Harris, P. van den Hoek, C. R. Jacob, H. Jacobsen, L. Jensen, J. W. Kaminski, G. van Kesse, F. Kootstra, A. Kovalenko, M. V. Krykunov, E. van Lenthe, D. A. McCormack, A. Michalak, M. Mitoraj, S. M. Morton, J. Neugebauer, V. P. Nicu, L. Noodleman, V. P. Osinga, S. Patchkovskii, M. Pavanello, P. H. T. Philipsen, D. Post, C. C. Pye, W. Ravenek, J. I. Rodríguez, P. Ros, P. R. T. Schipper, H. van Schoot, G. Schreckenbach, J. S. Seldenthuis, M. Seth, J. G. Snijders, M. Solà, M. Swart, D. Swerhone, G. te Velde, P. Vernooijs, L. Versluis, L. Visscher, O. Visser, F. Wang, T. A. Wesolowski, E. M. van Wezenbeek, G. Wiesenekker, S. K. Wolff, T. K. Woo and A. L. Yakovlev, SCM, Theoretical Chemistry, Vrije Universiteit, Amsterdam, The Netherlands, ADF2014.06 edn., 2014.

## **The full reference of Gaussian**

M. J. Frisch, G. W. Trucks, H. B. Schlegel, G. E. Scuseria, M. A. Robb, J. R. Cheeseman, G. Scalmani, V. Barone, B. Mennucci, G. A. Petersson, H. Nakatsuji, M. Caricato, X. Li, H. P. Hratchian, A. F. Izmaylov, J. Bloino, G. Zheng, J. L. Sonnenberg, M. Hada, M. Ehara, K. Toyota, R. Fukuda, J. Hasegawa, M. Ishida, T. Nakajima, Y. Honda, O. Kitao, H. Nakai, T. Vreven, J. A. Montgomery, Jr., J. E. Peralta, F. Ogliaro, M. Bearpark, J. J. Heyd, E. Brothers, K. N. Kudin, V. N. Staroverov, R. Kobayashi, J. Normand, K. Raghavachari, A. Rendell, J. C. Burant, S. S. Iyengar, J. Tomasi, M. Cossi, N. Rega, J. M. Millam, M. Klene, J. E. Knox, J. B. Cross, V. Bakken, C. Adamo, J. Jaramillo, R. Gomperts, R. E. Stratmann, O. Yazyev, A. J. Austin, R. P. Cammi, C., J. W. Ochterski, R. L. Martin, K. Morokuma, V. G. Zakrzewski, G. A. Voth, P. Salvador, J. J. Dannenberg, S. Dapprich, A. D. Daniels, O. Farkas, J. B. Foresman, J. V. Ortiz, J. Cioslowski and D. J. Fox, Gaussian, Inc., Wallingford CT, Gaussian 09, Revision D.01 edn., 2009.

## Cartesian coordinates of optimized complexes

\*Only the geometry of each complex in the energy-lowest electron-spin state is listed, as well as energy-degenerate doublet and quartet states for [U<sup>IV</sup>R]<sup>2-</sup>.

[U<sup>IV</sup>L]<sup>-</sup>

C 0.24255659 -0.41070499 0.39573044  
C 0.27098134 -1.23886706 1.54505335  
C 1.30187643 -0.19884195 -0.67488606  
N -1.03128509 0.04223901 0.15139815  
H 1.13702370 -1.72136776 1.99710047  
C -1.06251772 -1.26129020 2.04326492  
C 0.93229546 -1.34406162 -1.62690817  
C 1.15993313 1.18654315 -1.32975040  
C 2.72482630 -0.31326409 -0.10404754  
C -1.81894299 -0.44534323 1.16594711  
H -1.40535657 -1.76398328 2.94712303  
C -0.13238728 -1.20503181 -2.57591301  
C 1.41041215 -2.64514581 -1.34907336  
H 1.81357264 1.26286811 -2.21593440  
H 1.44569095 1.97052005 -0.60747434  
H 0.11867873 1.37677160 -1.62231893  
H 3.46933434 -0.28869126 -0.91834156  
H 2.88206733 -1.23721623 0.47213739  
H 2.91575254 0.53269576 0.57751256  
C -3.32642521 -0.27687902 1.05429082  
C -3.63769134 -1.42146883 0.08091553  
C -3.77754037 -2.73271183 0.59044754  
C 0.85929460 -3.80857893 -1.93328539  
N -1.19388071 -5.47111748 -0.53251639  
C -0.63374957 -2.35159254 -3.22331508  
H -0.51956226 -0.22174619 -2.84133799  
H 2.19745180 -2.76090605 -0.60544653  
C -3.68994086 1.10447193 0.48159098  
C -4.02248876 -0.42705925 2.41689059  
C -3.46086463 -1.26213649 -1.33218984  
H -3.88037063 -2.86292145 1.66667708  
C -3.71017548 -3.88613286 -0.22421133  
C 1.15480232 -5.17138750 -1.29301921  
C -0.20485313 -3.64896797 -2.87965834  
C -1.95861980 -5.20096914 0.57639533  
C 0.10247029 -5.16623350 -0.19491371  
H -1.39848151 -2.23310449 -3.99400817  
H -4.76628301 1.15087856 0.24130523  
H -3.10136325 1.32226772 -0.41960056  
H -3.45615608 1.88793596 1.22285512  
H -5.11874356 -0.43651012 2.29036253  
H -3.74688201 0.42138886 3.06558490  
H -3.73394438 -1.34775076 2.94562763  
C -3.47331574 -2.40093506 -2.16179676  
H -3.37201057 -0.27103264 -1.77606836  
C -3.53300899 -3.70625579 -1.63481556  
C -3.47255335 -5.24948631 0.43856763  
C 0.93655119 -6.34378382 -2.26571201  
C 2.57809832 -5.28329815 -0.72255013  
H -0.64679553 -4.51317370 -3.37468535  
C -1.16187417 -4.66915500 1.62043994  
C 0.17135906 -4.64667695 1.12150114

H -3.40539253 -2.26899393 -3.24382996  
H -3.49859904 -4.56275385 -2.30745187  
C -3.91170298 -6.42620678 -0.45066423  
C -4.16778869 -5.39595513 1.80198742  
H 1.17185495 -7.29588613 -1.75966929  
H 1.59019934 -6.23848584 -3.14892220  
H -0.11216757 -6.39605053 -2.58735366  
H 2.71450961 -6.27965778 -0.26954033  
H 2.78535554 -4.53874483 0.06043993  
H 3.32542868 -5.15184608 -1.52391601  
H -1.48093941 -4.38315289 2.62222657  
H 1.06099103 -4.34029618 1.67092778  
H -3.72812804 -7.37887765 0.07534117  
H -3.33100586 -6.45113193 -1.38242032  
H -4.98737813 -6.35071749 -0.68650545  
H -3.83042497 -4.64981265 2.53675510  
H -3.94557107 -6.39124340 2.22228254  
H -5.26086427 -5.29352334 1.68982685  
U -1.21531270 -2.67754491 -0.46382269

[U<sup>H</sup>L]

C 0.23341612 -0.44237158 0.37013194  
C 0.26832886 -1.24607941 1.53245555  
C 1.31092612 -0.19917848 -0.68360706  
N -1.04708470 -0.02536441 0.10605836  
H 1.14052340 -1.69162446 2.00852108  
C -1.06807473 -1.26863582 2.03190876  
C 0.97014185 -1.34526024 -1.64749080  
C 1.15197823 1.18882592 -1.32692110  
C 2.72568256 -0.30134944 -0.09086761  
C -1.82764080 -0.47712928 1.14041743  
H -1.40072298 -1.73443230 2.95832566  
C -0.03481554 -1.20675826 -2.63000097  
C 1.43048838 -2.64700153 -1.33862102  
H 1.82314607 1.28932218 -2.19580058  
H 1.41166754 1.96614908 -0.59039126  
H 0.11569913 1.37348426 -1.63941566  
H 3.48167030 -0.24943749 -0.89135780  
H 2.89474278 -1.22770862 0.47749605  
H 2.89171869 0.53894764 0.60168750  
C -3.33868201 -0.27760570 1.05421794  
C -3.67976381 -1.42396647 0.09075437  
C -3.78556305 -2.73518069 0.61174754  
C 0.89751227 -3.80478270 -1.95294205  
N -1.20534360 -5.39360225 -0.55991830  
C -0.55229799 -2.34824916 -3.27286714  
H -0.42891186 -0.22176208 -2.88125225  
H 2.19374966 -2.76469874 -0.57245537  
C -3.68182520 1.10712138 0.47943807  
C -4.01421091 -0.41464422 2.42834095  
C -3.57033615 -1.26697831 -1.30845542  
H -3.85534662 -2.86664839 1.68937277  
C -3.75215195 -3.88356824 -0.21407131  
C 1.16422030 -5.16944517 -1.30081323  
C -0.10669639 -3.64033184 -2.93219734  
C -1.96549416 -5.16362615 0.55927415

C 0.09536521 -5.12880920 -0.21157051  
H -1.30824953 -2.22916391 -4.05202152  
H -4.76114423 1.17819372 0.26594502  
H -3.11176789 1.31841264 -0.43485696  
H -3.41687382 1.88484910 1.21365355  
H -5.11098495 -0.39383603 2.32038414  
H -3.71004801 0.42808463 3.06911924  
H -3.74179244 -1.33919104 2.95819890  
C -3.56769188 -2.39988644 -2.14546863  
H -3.46730094 -0.27368430 -1.74594385  
C -3.64198073 -3.70061243 -1.61006963  
C -3.48494011 -5.24809347 0.43817014  
C 0.92919193 -6.34652013 -2.26253985  
C 2.57836756 -5.29766383 -0.71169204  
H -0.55553619 -4.50942463 -3.41373512  
C -1.16741270 -4.65928163 1.61134798  
C 0.16885544 -4.63671346 1.11153353  
H -3.51217683 -2.26734682 -3.22809349  
H -3.59352602 -4.56147055 -2.27732453  
C -3.90380196 -6.42843366 -0.45458730  
C -4.16106910 -5.41132742 1.80912214  
H 1.13786868 -7.29401024 -1.74017982  
H 1.59952332 -6.27060709 -3.13455616  
H -0.11383497 -6.38851436 -2.60306373  
H 2.69039263 -6.28992900 -0.24676000  
H 2.79712113 -4.54973646 0.06452228  
H 3.33558098 -5.19623661 -1.50625883  
H -1.47890715 -4.41530213 2.62589984  
H 1.06214975 -4.37226923 1.67542413  
H -3.69062340 -7.37578251 0.06620709  
H -3.33928466 -6.44354543 -1.39624069  
H -4.98361950 -6.38196956 -0.67220737  
H -3.83895251 -4.66146760 2.54648807  
H -3.91112206 -6.40116119 2.22270654  
H -5.25639247 -5.34120795 1.70740403  
U -1.20600384 -2.68085249 -0.43902616

[U<sup>III</sup>L]<sup>+</sup>

C 0.23349349 -0.48681756 0.35141885  
C 0.27262681 -1.24823171 1.53689087  
C 1.31708199 -0.20837002 -0.68925337  
N -1.06202825 -0.12507192 0.06176010  
H 1.14982093 -1.65303124 2.03971500  
C -1.06811641 -1.27087220 2.03809458  
C 0.98081214 -1.34798800 -1.66047216  
C 1.14289903 1.18682328 -1.31282427  
C 2.72836768 -0.30864757 -0.08893978  
C -1.83861901 -0.52184878 1.12599894  
H -1.38796228 -1.69601474 2.98841526  
C -0.01413097 -1.20884412 -2.65352952  
C 1.44133478 -2.64474909 -1.35948969  
H 1.82977553 1.31145720 -2.16505247  
H 1.38059417 1.95533584 -0.56121769  
H 0.11213294 1.36845800 -1.64494691  
H 3.48631518 -0.23515632 -0.88455087  
H 2.90952865 -1.23885835 0.46947378

H 2.88402286 0.52469772 0.61296804  
 C -3.34678201 -0.28719876 1.05421588  
 C -3.69627391 -1.42705004 0.08793456  
 C -3.80782259 -2.73344061 0.60286714  
 C 0.90844021 -3.79970627 -1.96477856  
 N -1.21418398 -5.28546834 -0.57837208  
 C -0.51611704 -2.34519509 -3.30742890  
 H -0.40120771 -0.22222372 -2.91068226  
 H 2.19698658 -2.76319667 -0.58489983  
 C -3.66541945 1.10565216 0.48488407  
 C -4.01457883 -0.42277431 2.43183551  
 C -3.60124898 -1.26957344 -1.31262794  
 H -3.86637781 -2.86552070 1.68182840  
 C -3.76848604 -3.87883049 -0.21615158  
 C 1.17095983 -5.15956105 -1.30375965  
 C -0.08572795 -3.63403628 -2.95453034  
 C -1.97395079 -5.11612980 0.55617909  
 C 0.09805390 -5.08116214 -0.21866757  
 H -1.25988995 -2.22499673 -4.09895389  
 H -4.74625028 1.20112191 0.29430180  
 H -3.11171612 1.31351318 -0.44031064  
 H -3.37326280 1.87496559 1.21620224  
 H -5.11032710 -0.38160190 2.32925365  
 H -3.69703333 0.41374109 3.07274417  
 H -3.75661194 -1.35137008 2.96202151  
 C -3.61771264 -2.39784120 -2.14788221  
 H -3.50725470 -0.27488425 -1.74981377  
 C -3.67261160 -3.69485890 -1.61343247  
 C -3.49264913 -5.23831029 0.44018156  
 C 0.92029773 -6.34767151 -2.24784651  
 C 2.58140692 -5.29114911 -0.70753735  
 H -0.52761070 -4.50375584 -3.44208037  
 C -1.16775024 -4.65839122 1.61785670  
 C 0.17292914 -4.63570702 1.11647485  
 H -3.57938577 -2.26453668 -3.23181943  
 H -3.63321496 -4.55646960 -2.28085535  
 C -3.88735960 -6.42921093 -0.44953347  
 C -4.16132233 -5.40454221 1.81401336  
 H 1.10755298 -7.28894294 -1.70843222  
 H 1.60476023 -6.30014507 -3.10974966  
 H -0.11692096 -6.38244643 -2.60665364  
 H 2.68332387 -6.27824828 -0.23149553  
 H 2.81244805 -4.53758822 0.05973187  
 H 3.33940158 -5.21211961 -1.50257233  
 H -1.46918080 -4.46038576 2.64551988  
 H 1.06858718 -4.41730243 1.69635441  
 H -3.64586406 -7.36935910 0.06992341  
 H -3.33979590 -6.43696834 -1.40133303  
 H -4.97043881 -6.41249302 -0.65024361  
 H -3.85368996 -4.65002209 2.55292881  
 H -3.89748931 -6.38916634 2.22905642  
 H -5.25684878 -5.35574940 1.71240069  
 U -1.20270002 -2.68204385 -0.43009214

[U<sup>1</sup>R]<sup>2-</sup>

U 15.27970170 10.42006001 14.39715085

O 17.40747662 10.21014264 15.15886765  
O 14.46335282 12.33473532 15.30274432  
O 14.09884779 8.71999682 15.32844437  
C 15.49773736 9.01627432 12.31641676  
C 16.55576446 9.99432001 12.29199783  
C 16.22437424 11.39469698 12.27440348  
C 14.85175168 11.82188130 12.37393213  
C 13.80383704 10.83578907 12.39795151  
C 14.12318761 9.43071607 12.41570570  
C 17.99428770 9.52816147 12.37919486  
H 17.96914700 8.48571897 12.76328642  
H 18.48391600 9.47275262 11.37886100  
C 18.91818077 10.33366717 13.27730382  
C 18.56061787 10.61225053 14.63311386  
C 19.48572808 11.32467269 15.44974416  
C 20.70719332 11.75122097 14.91981516  
H 21.40040087 12.30356505 15.57022475  
C 21.06498252 11.50313588 13.58871333  
C 20.14733562 10.79197109 12.79750076  
H 20.39697654 10.57814789 11.74842703  
C 14.54801469 13.29594946 12.54474499  
H 14.27562021 13.78754412 11.58161820  
H 15.49180312 13.77977034 12.87647363  
C 13.46276084 13.65674312 13.54527562  
C 13.50375020 13.15345088 14.88253492  
C 12.49285442 13.56670472 15.79798689  
C 11.47831870 14.43317713 15.38056168  
H 10.70818341 14.73208495 16.10596284  
C 11.41235948 14.91990967 14.06878885  
C 12.42026255 14.51170414 13.17956935  
H 12.40023638 14.87713076 12.14290657  
C 13.01230241 8.42401172 12.63191450  
H 12.64905270 7.98107135 11.67518086  
H 12.15067488 8.98536722 13.05302502  
C 13.31469300 7.26462279 13.56652192  
C 13.83255253 7.49770620 14.87822044  
C 14.04532805 6.37981318 15.73606173  
C 13.76517234 5.08595199 15.28707966  
H 13.94265513 4.24125514 15.96798793  
C 13.27590522 4.83845116 13.99805717  
C 13.06233410 5.95010916 13.16644517  
H 12.67614676 5.79175970 12.14939442  
C 19.10448414 11.60544846 16.87999119  
C 22.36407518 12.01744697 13.01276624  
H 22.22720553 12.94704250 12.42532451  
H 22.83083945 11.27940559 12.33538800  
H 23.09131043 12.24395236 13.81226388  
C 12.55007589 13.03923880 17.20805833  
C 10.27841748 15.80966099 13.61441693  
H 10.62578817 16.57616750 12.89839504  
H 9.81644300 16.33531943 14.46871917  
H 9.47201446 15.24236311 13.10837554  
C 14.58096206 6.63637901 17.12064567  
C 13.03209688 3.43097691 13.50460490  
H 13.89088520 3.02843629 12.93126823  
H 12.15285945 3.38213585 12.83734923  
H 12.85234577 2.73802157 14.34558622



H 12.76189554 11.15715641 12.51264481  
H 15.74564276 7.94955508 12.36888119  
H 17.02778216 12.14046290 12.29552201  
H 13.50691717 13.29653642 17.69692358  
H 11.72062401 13.44167280 17.81459674  
H 12.49678423 11.93477454 17.22292778  
H 19.90789871 12.15190263 17.40321411  
H 18.17543258 12.20275525 16.93511181  
H 18.89027427 10.67231497 17.43146434  
H 15.56450994 7.14027262 17.08052147  
H 13.92192130 7.31731654 17.68872607  
H 14.68920656 5.69342593 17.68363196

[U<sup>II</sup>R]<sup>-</sup>

U 15.25177208 10.38010042 14.56018223  
O 17.36747538 10.37581527 15.19952269  
O 14.36416825 12.28366309 15.23792396  
O 14.12600085 8.60852854 15.29151229  
C 15.45505458 8.99802706 12.35921408  
C 16.50994057 9.98586128 12.44506559  
C 16.12842932 11.37575270 12.31711692  
C 14.78566966 11.76874402 12.39754530  
C 13.75726319 10.76633707 12.55877049  
C 14.10938227 9.36675913 12.44632920  
C 17.96008826 9.55525585 12.46568881  
H 17.98219962 8.50706362 12.83066274  
H 18.39830074 9.52489155 11.44395813  
C 18.89570915 10.37918419 13.33462635  
C 18.55220061 10.71648677 14.67094449  
C 19.47604679 11.44331650 15.46518291  
C 20.70681514 11.81775172 14.92195578  
H 21.40650361 12.38468210 15.54919545  
C 21.06507091 11.50182281 13.60559632  
C 20.13739688 10.78801133 12.83766452  
H 20.38614521 10.53282438 11.79944335  
C 14.42752788 13.23983128 12.46923590  
H 14.05574306 13.58341136 11.48275778  
H 15.36345138 13.80233868 12.65919134  
C 13.39279622 13.65092905 13.50585618  
C 13.44546954 13.17429989 14.84225793  
C 12.49252485 13.64108039 15.78453330  
C 11.51875740 14.55843833 15.38527633  
H 10.78720322 14.90352262 16.12692154  
C 11.44366282 15.03756730 14.07166403  
C 12.38935054 14.56106836 13.15671306  
H 12.34981787 14.91241649 12.11755649  
C 13.01218459 8.33203197 12.63166817  
H 12.68494513 7.93378578 11.65106265  
H 12.13658973 8.86446277 13.05422540  
C 13.33854815 7.15877395 13.53559883  
C 13.85324616 7.37598935 14.84276313  
C 14.09550259 6.26117122 15.68594481  
C 13.83009858 4.97218668 15.21779557  
H 14.02952528 4.12180730 15.88222568  
C 13.33026023 4.73509668 13.93133075  
C 13.09899317 5.84766491 13.11316123

H 12.71182904 5.69299042 12.09795051  
C 19.09228357 11.80470128 16.87603894  
C 22.41160259 11.89506769 13.04374089  
H 22.37605705 11.97547560 11.94486651  
H 23.19476076 11.15493495 13.29248622  
H 22.74549118 12.86779145 13.44230867  
C 12.55099325 13.11608262 17.19489044  
C 10.39791108 16.04923920 13.66413476  
H 10.72167716 17.08508697 13.87647784  
H 9.44987309 15.88782766 14.20413098  
H 10.18510945 15.98882983 12.58416792  
C 14.64977372 6.50140100 17.06562077  
C 13.02564092 3.33402498 13.45437554  
H 13.07164217 3.26908419 12.35483069  
H 12.01504420 3.00447921 13.75950777  
H 13.74325029 2.60413003 13.86517647  
H 12.70684371 11.06871165 12.59360654  
H 15.71670419 7.93334015 12.39316957  
H 16.91280467 12.14186092 12.30512210  
H 13.53816088 13.30372878 17.65173037  
H 11.77575405 13.58468538 17.82165238  
H 12.40695024 12.02084517 17.22034353  
H 19.90828263 12.34739911 17.37918748  
H 18.18639091 12.43678099 16.89420094  
H 18.84702002 10.90545213 17.46752664  
H 15.63892414 6.99203944 17.02093508  
H 14.00013099 7.17951173 17.64573626  
H 14.75573364 5.55405098 17.61767356

[U<sup>III</sup>R]

U 15.29592487 10.42254990 14.75400051  
O 17.41738899 10.40874660 15.12680107  
O 14.28355226 12.24955106 15.28073940  
O 14.26009359 8.61178617 15.29077111  
C 15.51926334 9.05018508 12.45225416  
C 16.54974775 10.02155153 12.40385286  
C 16.19273701 11.39419646 12.41244876  
C 14.83769335 11.80195500 12.48620675  
C 13.82856529 10.80645118 12.53383049  
C 14.15399139 9.42732961 12.52648268  
C 18.00221660 9.58851389 12.41423682  
H 18.03433220 8.53163535 12.74246994  
H 18.38509908 9.59620327 11.37613526  
C 18.94980327 10.40555625 13.27312398  
C 18.62777423 10.73061601 14.61005936  
C 19.56337621 11.40992568 15.42210106  
C 20.79847450 11.76210124 14.87417855  
H 21.52089085 12.28678894 15.50981335  
C 21.13885261 11.47150066 13.54675016  
C 20.19715231 10.79067238 12.76912950  
H 20.44263506 10.53880238 11.73089299  
C 14.49268004 13.27467305 12.58362292  
H 14.21697348 13.64482853 11.57801245  
H 15.41605847 13.81694023 12.86491011  
C 13.38158940 13.65083155 13.54644761  
C 13.36351846 13.15536961 14.87008813

C 12.37404449 13.59111005 15.77907306  
C 11.41388158 14.50561065 15.34026761  
H 10.65031478 14.84223057 16.05073291  
C 11.39425775 14.99962758 14.02998957  
C 12.39092149 14.55736484 13.15411630  
H 12.40745510 14.93834161 12.12635122  
C 13.05930752 8.38853348 12.66803758  
H 12.79798487 8.00504690 11.66357915  
H 12.15400256 8.90499746 13.04153349  
C 13.36002455 7.20083042 13.56356256  
C 13.90066276 7.37969735 14.85683995  
C 14.08567797 6.26910767 15.71035821  
C 13.73655157 4.99917589 15.24642087  
H 13.87993711 4.14187694 15.91400906  
C 13.21627109 4.78782546 13.96310711  
C 13.03649688 5.90599757 13.14304574  
H 12.61877630 5.77081442 12.13859776  
C 19.20931387 11.73782219 16.84820048  
C 22.46608464 11.90243844 12.97107716  
H 22.72552275 11.31192218 12.07873685  
H 23.27879515 11.78492593 13.70569652  
H 22.44742287 12.96516698 12.67133515  
C 12.37583394 13.06301712 17.18894942  
C 10.31846224 15.95450777 13.57212577  
H 10.00408316 16.62394614 14.38839380  
H 9.42000541 15.41211428 13.22811438  
H 10.66719859 16.57862795 12.73450288  
C 14.65229284 6.47830404 17.08941814  
C 12.88601605 3.39779931 13.47573620  
H 12.17082522 3.42719927 12.63905810  
H 12.44592758 2.78560309 14.27910083  
H 13.78973452 2.87155731 13.12085302  
H 12.78350038 11.11679429 12.63620236  
H 15.77744636 7.98681905 12.49182141  
H 16.98729098 12.14759031 12.42049545  
H 13.33949467 13.25847016 17.68943437  
H 11.57382446 13.52755753 17.78152404  
H 12.22934842 11.96849503 17.20879768  
H 20.05531662 12.21983126 17.36019676  
H 18.34132106 12.41870445 16.90100747  
H 18.92984342 10.83085262 17.41081205  
H 15.67292947 6.89806117 17.04555301  
H 14.04456617 7.19424311 17.66857499  
H 14.69511720 5.52848582 17.64273054

[U<sup>1</sup>Cp<sub>3</sub>]<sup>2-</sup>

C -5.36224495 0.80221835 2.90721858  
H -5.19352095 1.86727423 3.06119514  
C -4.36306049 -0.21245186 2.89830918  
H -3.29210586 -0.06249087 3.04544565  
C -5.01283740 -1.45971430 2.68440771  
H -4.51872269 -2.43297202 2.66303112  
C -6.43450831 -1.23699713 2.55959213  
C -6.61896434 0.19229240 2.68294546  
C -4.42989604 2.55220268 0.46627956  
H -4.39299151 3.01070065 1.45485297

C -5.56486161 2.57097138 -0.41823916  
C -5.13687951 1.88413354 -1.61573980  
C -3.78595559 1.47720388 -1.45722710  
H -3.18481206 0.94688091 -2.19533252  
C -3.34884754 1.88462541 -0.16311663  
H -2.35580196 1.72611283 0.26103736  
C -5.20173596 -1.69332150 -2.13701623  
C -3.88273320 -1.74426657 -1.55530783  
H -2.97724809 -1.31424240 -1.98794023  
C -3.93836307 -2.48920642 -0.34294041  
H -3.09686400 -2.70420796 0.31930871  
C -5.28694127 -2.92000906 -0.16191190  
H -5.66074477 -3.50615071 0.67792100  
C -6.05992068 -2.43274326 -1.24263454  
U -5.24996289 -0.15880781 0.24964290  
H -5.75155395 1.73554028 -2.50390118  
H -7.58088481 0.70520720 2.65362860  
H -7.12969733 -2.58819093 -1.38411271  
Si -7.10484699 3.57197403 -0.22679800  
Si -7.78915810 -2.48862773 2.70482000  
Si -5.67434420 -1.26162835 -3.86811928  
C -8.58428559 2.87741875 -1.21210632  
C -7.61499527 3.82604961 1.59937424  
C -6.85187384 5.37051736 -0.90221803  
C -8.83722829 -2.92329030 1.16682012  
C -9.07189475 -1.88079276 4.00798950  
C -7.09204629 -4.14863602 3.37890659  
C -4.48781056 -0.02723933 -4.72808995  
C -7.46571725 -0.61379362 -4.01320785  
C -5.62029976 -2.82412400 -5.00783230  
H -8.25487180 -3.52571830 0.45066495  
H -9.11964660 -1.99188502 0.64367505  
H -9.74996351 -3.48536727 1.44592585  
H -8.57642232 -1.66868704 4.97124853  
H -9.87339379 -2.62340424 4.17730426  
H -9.54380381 -0.94348393 3.66453114  
H -6.57549241 -3.99040907 4.34153894  
H -6.36082927 -4.58497430 2.67643912  
H -7.89861317 -4.88914655 3.53036668  
H -6.79666975 4.29598258 2.17396806  
H -7.84122368 2.85574518 2.06895008  
H -8.50504593 4.47732462 1.67526113  
H -8.37008472 2.88520077 -2.29619345  
H -9.50386209 3.46668273 -1.03576414  
H -8.75129031 1.82722184 -0.91056333  
H -6.56314119 5.33877916 -1.96785477  
H -6.03484694 5.87451906 -0.35515800  
H -7.76325269 5.99149086 -0.81047542  
H -7.61247598 0.26208194 -3.35911689  
H -8.17777971 -1.38656902 -3.67348691  
H -7.71899724 -0.34248032 -5.05498882  
H -4.59962799 -3.24591126 -5.02954171  
H -5.92630361 -2.60233732 -6.04783192  
H -6.28994667 -3.60623210 -4.60891192  
H -4.50363187 0.96279433 -4.24522286  
H -4.76607322 0.09446716 -5.79107194  
H -3.44955406 -0.40219805 -4.69058230

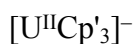

C -5.37043259 1.10573704 2.67506723  
H -5.17714061 2.17312303 2.76891804  
C -4.41737263 0.06375137 2.87472838  
H -3.37350947 0.18979645 3.16286982  
C -5.10051501 -1.17103882 2.70642339  
H -4.65497473 -2.15594294 2.84495696  
C -6.47106027 -0.91800550 2.37693250  
C -6.61443156 0.51158952 2.35673757  
C -4.58902551 2.73732243 0.06688948  
H -4.49074801 3.27462535 1.00995421  
C -5.81165865 2.53605764 -0.65116928  
C -5.45235998 1.83562476 -1.85328118  
C -4.05278406 1.62850843 -1.86709592  
H -3.48474055 1.15340371 -2.66526222  
C -3.51053919 2.17000892 -0.66437233  
H -2.45677914 2.19772736 -0.38617459  
C -5.11176195 -1.86090927 -1.95872054  
C -3.72575948 -1.52818851 -1.81949374  
H -3.12488023 -1.00008841 -2.55961889  
C -3.23738428 -2.03730873 -0.58578612  
H -2.21224203 -1.97104416 -0.22074629  
C -4.31748715 -2.71946008 0.04818925  
H -4.26556278 -3.25471000 0.99491849  
C -5.46067375 -2.59988442 -0.77681984  
U -4.95871116 -0.02181965 0.17268757  
H -6.14566499 1.55707963 -2.64819057  
H -7.54813745 1.04584361 2.17532385  
H -6.43903572 -3.03959992 -0.57776764  
Si -7.44940656 3.37200668 -0.33563617  
Si -7.87650741 -2.14474734 2.39953014  
Si -6.14080017 -1.75683850 -3.51143465  
C -7.64231683 4.85573731 -1.53267724  
C -8.94448576 2.23502048 -0.64935501  
C -7.54088581 4.09441035 1.42718994  
C -9.15410753 -1.84677370 1.01917567  
C -8.82734933 -1.98471296 4.05535448  
C -7.24194978 -3.94166888 2.32093100  
C -5.35320306 -0.59050325 -4.79871062  
C -7.94371421 -1.23835843 -3.18365735  
C -6.22012216 -3.48603081 -4.33307833  
H -8.68702416 -1.91611310 0.02324310  
H -9.58414755 -0.83377910 1.10563446  
H -9.98304183 -2.57441676 1.07868103  
H -8.15039240 -2.16599497 4.90777074  
H -9.66528236 -2.70161861 4.11880016  
H -9.23692101 -0.96637841 4.16920361  
H -6.57352177 -4.15316860 3.17320473  
H -6.68136516 -4.14383822 1.39428619  
H -8.08786849 -4.64926063 2.37311099  
H -8.91129943 1.34566029 0.00086716  
H -8.94073195 1.87410410 -1.69256475  
H -9.89558067 2.76998663 -0.47795205  
H -6.81525867 5.57296972 -1.39380720  
H -8.59584681 5.39017451 -1.37375816

H -7.61074605 4.51352129 -2.58129565  
H -6.73439281 4.83091225 1.58537629  
H -7.44307043 3.31570312 2.20039060  
H -8.50409647 4.61207417 1.57964225  
H -7.99160643 -0.24687110 -2.70459701  
H -8.43085476 -1.95340309 -2.49810933  
H -8.52825709 -1.21319171 -4.12057595  
H -5.20482519 -3.84613026 -4.57232936  
H -6.81196850 -3.47092841 -5.26560091  
H -6.67792755 -4.21938120 -3.64727625  
H -5.26630165 0.44224314 -4.42494261  
H -5.95928743 -0.57304390 -5.72139909  
H -4.34117085 -0.93886095 -5.06766343

[U<sup>1</sup>R]<sup>2-</sup> (Doublet)

U 15.27970170 10.42006001 14.39715085  
O 17.40747662 10.21014264 15.15886765  
O 14.46335282 12.33473532 15.30274432  
O 14.09884779 8.71999682 15.32844437  
C 15.49773736 9.01627432 12.31641676  
C 16.55576446 9.99432001 12.29199783  
C 16.22437424 11.39469698 12.27440348  
C 14.85175168 11.82188130 12.37393213  
C 13.80383704 10.83578907 12.39795151  
C 14.12318761 9.43071607 12.41570570  
C 17.99428770 9.52816147 12.37919486  
H 17.96914700 8.48571897 12.76328642  
H 18.48391600 9.47275262 11.37886100  
C 18.91818077 10.33366717 13.27730382  
C 18.56061787 10.61225053 14.63311386  
C 19.48572808 11.32467269 15.44974416  
C 20.70719332 11.75122097 14.91981516  
H 21.40040087 12.30356505 15.57022475  
C 21.06498252 11.50313588 13.58871333  
C 20.14733562 10.79197109 12.79750076  
H 20.39697654 10.57814789 11.74842703  
C 14.54801469 13.29594946 12.54474499  
H 14.27562021 13.78754412 11.58161820  
H 15.49180312 13.77977034 12.87647363  
C 13.46276084 13.65674312 13.54527562  
C 13.50375020 13.15345088 14.88253492  
C 12.49285442 13.56670472 15.79798689  
C 11.47831870 14.43317713 15.38056168  
H 10.70818341 14.73208495 16.10596284  
C 11.41235948 14.91990967 14.06878885  
C 12.42026255 14.51170414 13.17956935  
H 12.40023638 14.87713076 12.14290657  
C 13.01230241 8.42401172 12.63191450  
H 12.64905270 7.98107135 11.67518086  
H 12.15067488 8.98536722 13.05302502  
C 13.31469300 7.26462279 13.56652192  
C 13.83255253 7.49770620 14.87822044  
C 14.04532805 6.37981318 15.73606173  
C 13.76517234 5.08595199 15.28707966  
H 13.94265513 4.24125514 15.96798793  
C 13.27590522 4.83845116 13.99805717

C 13.06233410 5.95010916 13.16644517  
H 12.67614676 5.79175970 12.14939442  
C 19.10448414 11.60544846 16.87999119  
C 22.36407518 12.01744697 13.01276624  
H 22.22720553 12.94704250 12.42532451  
H 22.83083945 11.27940559 12.33538800  
H 23.09131043 12.24395236 13.81226388  
C 12.55007589 13.03923880 17.20805833  
C 10.27841748 15.80966099 13.61441693  
H 10.62578817 16.57616750 12.89839504  
H 9.81644300 16.33531943 14.46871917  
H 9.47201446 15.24236311 13.10837554  
C 14.58096206 6.63637901 17.12064567  
C 13.03209688 3.43097691 13.50460490  
H 13.89088520 3.02843629 12.93126823  
H 12.15285945 3.38213585 12.83734923  
H 12.85234577 2.73802157 14.34558622  
H 12.76189554 11.15715641 12.51264481  
H 15.74564276 7.94955508 12.36888119  
H 17.02778216 12.14046290 12.29552201  
H 13.50691717 13.29653642 17.69692358  
H 11.72062401 13.44167280 17.81459674  
H 12.49678423 11.93477454 17.22292778  
H 19.90789871 12.15190263 17.40321411  
H 18.17543258 12.20275525 16.93511181  
H 18.89027427 10.67231497 17.43146434  
H 15.56450994 7.14027262 17.08052147  
H 13.92192130 7.31731654 17.68872607  
H 14.68920656 5.69342593 17.68363196

[U<sup>1</sup>R]<sup>2-</sup> (Quartet)

U 15.34131219 10.39960278 14.46246843  
O 17.50159964 10.07421562 15.12642890  
O 14.56970761 12.34855846 15.36824378  
O 13.95985859 8.77466684 15.26484124  
C 15.57965342 8.97963925 12.38282874  
C 16.62319730 9.98528513 12.23896273  
C 16.28508723 11.34974421 12.23154719  
C 14.91345508 11.78378623 12.44598199  
C 13.87232411 10.77216329 12.34251662  
C 14.19110877 9.40179908 12.34269107  
C 18.07035542 9.52912214 12.33391107  
H 18.04616931 8.49326734 12.73039352  
H 18.54851059 9.46754572 11.33243809  
C 18.97165309 10.35566302 13.23153282  
C 18.61355709 10.57274976 14.60153268  
C 19.51546678 11.31076228 15.42506211  
C 20.70204729 11.81830890 14.89008388  
H 21.37387997 12.38868283 15.54753402  
C 21.05533226 11.62957546 13.54634609  
C 20.16616921 10.89115981 12.74657742  
H 20.41469097 10.71965402 11.68947313  
C 14.59358364 13.25301524 12.58484501  
H 14.30717406 13.73887609 11.61925191  
H 15.53317944 13.75277898 12.90433506  
C 13.51236555 13.60775871 13.59429756

C 13.58365456 13.12716946 14.94141639  
C 12.57104089 13.53841334 15.85951958  
C 11.53383336 14.37357206 15.43736864  
H 10.76496822 14.66844651 16.16599597  
C 11.44094053 14.83580350 14.11816551  
C 12.44871301 14.43301764 13.22519416  
H 12.41050977 14.77889883 12.18212720  
C 13.08584254 8.37360727 12.48905194  
H 12.87166909 7.88254608 11.51412050  
H 12.16341639 8.92255758 12.76961380  
C 13.31106109 7.25735224 13.49966227  
C 13.72537186 7.54204797 14.83959698  
C 13.84737176 6.45236713 15.75380617  
C 13.58241701 5.14671237 15.33571630  
H 13.69002798 4.32864133 16.06234256  
C 13.19369401 4.85142427 14.02172381  
C 13.06815907 5.93162836 13.13340480  
H 12.76344882 5.73522259 12.09520377  
C 19.14121969 11.52923631 16.86734747  
C 22.31490335 12.23257449 12.96992683  
H 22.13427179 13.21189181 12.48241126  
H 22.76594006 11.57525357 12.20461388  
H 23.07389566 12.39968333 13.75488885  
C 12.65459021 13.03546270 17.27661532  
C 10.28469920 15.69500264 13.66195610  
H 10.61654022 16.49882282 12.97957066  
H 9.78239723 16.17345728 14.52111135  
H 9.51349829 15.11407913 13.11774918  
C 14.27939548 6.75770470 17.16372081  
C 12.96575508 3.42867236 13.56700552  
H 13.86950744 2.97798226 13.10970046  
H 12.16289724 3.36919379 12.81035952  
H 12.67591175 2.77971460 14.41255211  
H 12.82381463 11.07762235 12.45056745  
H 15.82673706 7.91640236 12.30281128  
H 17.09014119 12.09541648 12.25831317  
H 13.61323635 13.31647490 17.74836617  
H 11.82526101 13.43200608 17.88735910  
H 12.62227641 11.93002563 17.30675200  
H 19.92728438 12.09166560 17.40004351  
H 18.18842195 12.08613263 16.94955906  
H 18.96999160 10.57065384 17.38902982  
H 15.28194520 7.22592295 17.17790974  
H 13.60425369 7.48917308 17.64253946  
H 14.30810624 5.84026980 17.77649554

[U<sup>III</sup>RE]-

U 15.24980879 10.34818915 14.47996672  
O 17.35904183 10.62892976 15.12520482  
O 14.12005510 12.12592124 15.16730829  
O 14.35282649 8.43137579 15.16388697  
C 15.61543856 8.97857248 12.24228842  
C 16.54233316 10.09973747 12.38279536  
C 16.01244954 11.44149510 12.19345687  
C 14.62833327 11.66495950 12.33883638  
C 13.69850153 10.54907015 12.52201899



C 14.23599476 9.20143602 12.35965007  
C 16.16793664 7.58180315 12.05173029  
H 16.94807141 7.58415864 11.27017260  
H 15.38532331 6.87752623 11.74111191  
H 16.62631650 7.15742011 12.96639710  
C 16.97166431 12.58692506 11.92212417  
H 16.57395765 13.25710547 11.14115846  
H 17.93704798 12.20646640 11.56328545  
H 17.19213062 13.20540363 12.81250788  
C 12.20665922 10.79163347 12.40276333  
H 11.82651486 10.57186037 11.38193160  
H 11.95763580 11.83824691 12.62467350  
H 11.61167485 10.18741142 13.10876829  
C 18.03186465 9.81868103 12.41365091  
H 18.15441086 8.76649470 12.72909654  
H 18.48104612 9.86463979 11.39581528  
C 18.93565899 10.63901581 13.32598674  
C 18.57935169 10.96173462 14.66657355  
C 19.53536605 11.62913192 15.49745722  
C 20.77742042 11.96665246 14.94006951  
H 21.51611471 12.48057564 15.55913332  
C 21.13097033 11.67942725 13.61955947  
C 20.19092787 11.00696750 12.83811764  
H 20.43688894 10.75052702 11.79936862  
C 14.12375880 13.09737866 12.38033244  
H 13.60342465 13.33232596 11.42948734  
H 15.00331427 13.76197804 12.40147455  
C 13.20120189 13.57931287 13.50054596  
C 13.25229193 13.09755447 14.83920482  
C 12.35144116 13.64959390 15.80841146  
C 11.48604033 14.67507585 15.40444392  
H 10.79608191 15.10681852 16.13260877  
C 11.44449619 15.17682703 14.10091312  
C 12.30447808 14.59969837 13.16869031  
H 12.28073090 14.94778205 12.12791602  
C 13.26971911 8.03095641 12.46916455  
H 13.17423147 7.53716899 11.48200334  
H 12.26859413 8.44129798 12.67671170  
C 13.51907475 6.92938342 13.49457992  
C 14.01977326 7.18005754 14.80457091  
C 14.16928180 6.08075633 15.71214365  
C 13.79529979 4.80233855 15.27586692  
H 13.90290099 3.95484437 15.95635561  
C 13.29180625 4.54370725 13.99790338  
C 13.17411688 5.62591057 13.12698937  
H 12.79736770 5.45798735 12.10960186  
C 19.24142589 11.95669406 16.97124796  
C 20.12490668 12.94886508 19.15603992  
H 21.00715768 13.43444743 19.61516322  
C 18.60352872 10.96017711 19.23088295  
H 18.36858316 10.01500838 19.75467900  
C 17.70517741 13.21848767 18.56819785  
H 16.82687605 13.88849849 18.61463315  
C 20.43988374 12.64176506 17.67923149  
H 21.32887229 11.98683692 17.62571329  
H 20.69153148 13.58447460 17.15967900  
C 19.80984098 11.63974772 19.90180053

H 19.58981802 11.85225598 20.96521110  
H 20.68735527 10.96726840 19.87314440  
C 17.38596839 11.90051039 19.29882830  
H 16.51164562 11.41544619 18.82968114  
H 17.12119850 12.10394414 20.35388323  
C 18.03084467 12.92239625 17.09267131  
H 18.26624217 13.86121468 16.55745799  
H 17.15749434 12.47521373 16.59301605  
C 18.93245258 10.65290328 17.75869322  
H 18.08872350 10.13680562 17.27426646  
H 19.81001250 9.98251063 17.69454417  
C 18.91252724 13.89346600 19.24159436  
H 19.14138305 14.85021328 18.73654654  
H 18.68464260 14.12385808 20.29962230  
C 22.46586448 12.10456429 13.05412225  
H 22.39061764 13.05687726 12.49761257  
H 22.86491898 11.35115585 12.35444209  
H 23.20953472 12.25074889 13.85451894  
C 12.29775834 13.13216468 17.25661199  
C 11.19842170 13.33427377 19.55733740  
H 10.43143569 13.89431635 20.12570296  
C 13.63343347 12.77070577 19.39754867  
H 14.62758761 12.90358879 19.86165115  
C 11.89443643 11.07979868 18.71779290  
H 11.64587797 10.00245320 18.68977280  
C 11.23930268 13.87478278 18.11479758  
H 11.46950541 14.95581605 18.13931013  
H 10.23994813 13.75930662 17.65689288  
C 12.57420744 13.52510896 20.21942774  
H 12.55177953 13.14558402 21.25856666  
H 12.82636941 14.60091242 20.26533825  
C 13.27973737 11.27216981 19.36275476  
H 13.28472302 10.85588799 20.38794665  
H 14.04070096 10.72029940 18.78218992  
C 11.91780708 11.62542576 17.27861737  
H 10.92619382 11.50043569 16.80528615  
H 12.63914965 11.05823503 16.66994438  
C 13.66925789 13.32262502 17.96048620  
H 14.44585259 12.81283617 17.36903205  
H 13.91798910 14.40043372 17.97017307  
C 10.83899334 11.83765975 19.54158780  
H 10.80225093 11.44539902 20.57559740  
H 9.83691090 11.69303381 19.09693411  
C 10.51595110 16.30740685 13.72464654  
H 11.00091092 17.29352375 13.84573203  
H 9.61119897 16.30897582 14.35460785  
H 10.19606888 16.22923030 12.67240688  
C 14.72947712 6.27171511 17.13281577  
C 15.33843396 5.16303905 19.35606698  
H 15.34774142 4.19240198 19.88778025  
C 14.42105369 7.49354657 19.34991573  
H 13.78344590 8.21998103 19.88665411  
C 16.74652728 7.04510234 18.49147983  
H 17.77125838 7.45240329 18.40879739  
C 14.77381544 4.94631233 17.93857505  
H 13.75603802 4.52115844 18.01304936  
H 15.40299727 4.20779047 17.40893595

C 14.45225294 6.16242470 20.12062251  
H 14.84910473 6.31761429 21.14177896  
H 13.42721458 5.75967858 20.22131148  
C 15.85219857 8.05209022 19.23852887  
H 16.26253889 8.25307409 20.24620398  
H 15.83909310 9.01331312 18.69375524  
C 16.18504493 6.81271057 17.07703103  
H 16.81537288 6.08802473 16.52867488  
H 16.20332340 7.75442798 16.50612383  
C 13.84733581 7.26434359 17.93966083  
H 13.78516675 8.21508897 17.38757907  
H 12.82163797 6.85542160 18.00589438  
C 16.77251757 5.71504698 19.26411803  
H 17.42569174 4.98883707 18.74562906  
H 17.18658933 5.86703575 20.27888410  
C 12.87064821 3.15192891 13.58809105  
H 13.04188991 2.98178909 12.51214829  
H 11.79603477 2.97535784 13.77882913  
H 13.43170065 2.38390997 14.14552606

[U<sup>III</sup>R<sup>E</sup>]

U 15.28966017 10.42191091 14.64888140  
O 17.40519980 10.59026093 15.05004700  
O 14.12548529 12.15179469 15.21166661  
O 14.41515993 8.52760322 15.20758743  
C 15.62608523 9.05926795 12.32832711  
C 16.57166502 10.13260676 12.32496410  
C 16.11998906 11.48650454 12.29739044  
C 14.72233414 11.76792777 12.41446305  
C 13.77358463 10.70131152 12.41877194  
C 14.23280136 9.34681640 12.44596194  
C 16.10008048 7.63233542 12.14416909  
H 16.87550284 7.58879973 11.36252018  
H 15.27635523 6.98022545 11.83106159  
H 16.52361016 7.18699951 13.06224624  
C 17.10420487 12.61765094 12.08175419  
H 16.69912581 13.33782115 11.35264689  
H 18.05547435 12.24360647 11.68571230  
H 17.34387041 13.17449305 13.00536413  
C 12.29030100 10.99603146 12.33149793  
H 11.80987351 10.31227305 11.61325022  
H 12.11107876 12.02060462 11.98519465  
H 11.76337201 10.89261711 13.29702223  
C 18.05465608 9.79014102 12.35701479  
H 18.14085521 8.72778799 12.63941735  
H 18.46571318 9.85230576 11.33043777  
C 18.99376926 10.56218760 13.27348403  
C 18.65293571 10.89142205 14.60789908  
C 19.60457847 11.54272875 15.44712201  
C 20.86135274 11.82815030 14.89600590  
H 21.60712888 12.33041440 15.51458153  
C 21.22170193 11.50831319 13.58304386  
C 20.26592490 10.87736618 12.78868678  
H 20.51255756 10.61775679 11.75219288  
C 14.28488516 13.22078339 12.53768856  
H 13.94515080 13.58424376 11.54817127

H 15.18293924 13.81611141 12.77174488  
C 13.22448816 13.61236419 13.55760160  
C 13.21303106 13.09988903 14.87761627  
C 12.24431282 13.56566876 15.81510851  
C 11.33298541 14.53445451 15.37291038  
H 10.57818547 14.90542522 16.06842989  
C 11.32860060 15.05856089 14.07624709  
C 12.28455456 14.57654625 13.18386296  
H 12.30576051 14.96086211 12.15702694  
C 13.20341785 8.23698908 12.60796181  
H 12.97628984 7.80203806 11.61502099  
H 12.26282870 8.70680215 12.94018664  
C 13.47482635 7.08226169 13.56229124  
C 14.02652080 7.27638076 14.85194706  
C 14.18198628 6.16762699 15.73546516  
C 13.76784422 4.91123589 15.27214174  
H 13.87985085 4.04449574 15.92582406  
C 13.21633451 4.69653676 14.00495759  
C 13.08351173 5.80092753 13.16513239  
H 12.66039739 5.66782619 12.16223444  
C 19.29329765 11.92627973 16.90431602  
C 20.17287370 12.96728126 19.06730385  
H 21.06326412 13.43879042 19.52248681  
C 18.58461482 11.03467427 19.18499890  
H 18.31034158 10.11702316 19.73648065  
C 17.77456179 13.29680606 18.42756578  
H 16.91929809 13.99735090 18.43265994  
C 20.50294296 12.59710667 17.60836269  
H 21.36956083 11.91152159 17.59517111  
H 20.79437701 13.51201716 17.06127763  
C 19.80144393 11.69756974 19.85290656  
H 19.57000293 11.95517960 20.90274695  
H 20.65502860 10.99547544 19.86652487  
C 17.39757186 12.01588710 19.19559520  
H 16.51327790 11.54363645 18.72858387  
H 17.12008410 12.26474566 20.23646966  
C 18.11667608 12.93978668 16.96929358  
H 18.39613682 13.85080285 16.40831363  
H 17.22957232 12.51485742 16.47235788  
C 18.92972737 10.66156028 17.73164903  
H 18.07891337 10.14619333 17.25845663  
H 19.78661636 9.96316735 17.70911336  
C 18.99292000 13.95459861 19.09768897  
H 19.26140815 14.88551287 18.56560815  
H 18.75466447 14.22926619 20.14164387  
C 22.60429341 11.81196851 13.05858010  
H 22.59681132 11.95158837 11.96603668  
H 23.30676886 10.98929448 13.28047111  
H 23.01464692 12.72567846 13.51679756  
C 12.17887531 13.04463845 17.26135080  
C 11.01015918 13.19771633 19.52992019  
H 10.19750483 13.71563571 20.07179871  
C 13.47721282 12.77727600 19.43892579  
H 14.45014842 12.97273212 19.92536121  
C 11.85857959 10.98253380 18.72809414  
H 11.67395339 9.89282290 18.70129019  
C 11.05521130 13.72943693 18.08429405

H 11.22016441 14.82195733 18.10454349  
H 10.07641593 13.54997088 17.60363582  
C 12.35414788 13.47401747 20.22602767  
H 12.32624521 13.10119801 21.26637742  
H 12.54241354 14.56225297 20.27109346  
C 13.21366871 11.26030274 19.40576657  
H 13.21534230 10.85220532 20.43328407  
H 14.02305474 10.74856297 18.85249944  
C 11.88651294 11.51817366 17.28469857  
H 10.91610949 11.33090934 16.78872798  
H 12.65412367 10.98181063 16.70368357  
C 13.51786544 13.32348857 17.99998858  
H 14.34761730 12.86261654 17.44097961  
H 13.69845198 14.41427387 18.00985450  
C 10.73932355 11.68296514 19.51728805  
H 10.69956350 11.29593833 20.55203099  
H 9.75925052 11.47516560 19.05031138  
C 10.34123058 16.12598619 13.67064045  
H 10.72240964 17.13516393 13.90675985  
H 9.38225631 16.00615865 14.19907186  
H 10.14060403 16.09576248 12.58804371  
C 14.77458729 6.31490869 17.14775736  
C 15.39986250 5.13671620 19.32875646  
H 15.40189584 4.15230975 19.83199520  
C 14.51797208 7.47948311 19.40089865  
H 13.89837142 8.19944730 19.96585742  
C 16.82301735 7.02013618 18.49384677  
H 17.85272621 7.41268586 18.40515796  
C 14.80979592 4.96649010 17.91551286  
H 13.78680901 4.55641203 17.99644343  
H 15.41869270 4.23308957 17.35635045  
C 14.54011098 6.12700846 20.13336552  
H 14.95384069 6.24856821 21.15127536  
H 13.51120629 5.73759295 20.24037665  
C 15.95513496 8.01994824 19.28116614  
H 16.38357000 8.18527056 20.28687644  
H 15.94859114 8.99900038 18.76686526  
C 16.23858131 6.83276078 17.08159154  
H 16.84923706 6.11105894 16.50800600  
H 16.27235625 7.78918819 16.53517641  
C 13.91854519 7.29815154 17.99437622  
H 13.85805265 8.26930926 17.47801341  
H 12.88847950 6.90266293 18.06549756  
C 16.84026694 5.66901500 19.22897406  
H 17.47563767 4.94831372 18.68245861  
H 17.27181945 5.78776361 20.23977398  
C 12.75768881 3.32334731 13.57736791  
H 12.80230149 3.20864997 12.48281211  
H 11.71414083 3.13522710 13.88576909  
H 13.38000129 2.53468733 14.02898630
